# Supplementary material for: Synthesis and in vitro antibacterial, antifungal, anti-proliferative activities of novel adamantane-containing thiazole compounds
Source: Springer Nature journal article supplement (doi:10.1038/s41598-022-25390-0), 2022-12-06

## Supplementary data

# Synthesis and *in vitro* antibacterial, antifungal, anti-proliferative activities of novel adamantane-containing thiazole compounds

Eman T. Warda<sup>1</sup>, Mahmoud B. El-Ashmawy<sup>1</sup>, El-Sayed E. Habib<sup>2</sup>, Mohammed S. M. Abdelbaky<sup>3</sup>, Santiago Garcia-Granda<sup>3</sup>, Subbiah Thamoetharan<sup>4</sup>, Ali A. El-Emam<sup>1\*</sup>

<sup>1</sup> *Department of Medicinal Chemistry, Faculty of Pharmacy, Mansoura University, Mansoura 35516, Egypt*

<sup>2</sup> *Department of Microbiology and Immunology, Faculty of Pharmacy, Mansoura University, Mansoura 35516, Egypt*

<sup>3</sup> *Department of Physical and Analytical Chemistry, Faculty of Chemistry, Oviedo University-CINN, Oviedo 33006, Spain*

<sup>4</sup> *Biomolecular Crystallography Laboratory, Department of Bioinformatics, School of chemical and Biotechnology, SASTRA Deemed University, Thanjavur-613 401, India*

## Contents

1. Crystal data and structure refinement parameters for compounds **5d** and **5f** (Table S1).
2. PASS prediction of compounds **5a-r** (Table S2).
3. Molecular formulae, molecular weights and elemental analyses data of compounds **5a-r** (Table S3)
4. NMR spectra of synthesised compounds **5a-r**.
5. Checkcif reports for crystals **5d** and **5f**.
6. Determination of antimicrobial activity of compounds **5a-r** (agar disc-diffusion method).
7. Determination of minimal inhibitory concentrations (MIC) and the minimal biocidal concentrations (MBC) for compounds **5a**, **5c**, **5g**, **5l**, **5m**, **5o** and **5q** (micro-dilution susceptibility method).
8. Determination of bacterial biofilm inhibitory activity of compounds **5a**, **5c**, **5l** and **5o** (crystal violet staining method).
9. Determination of anti-proliferative activity (MTT assay)

**Table S1.** Crystal data and structure refinement parameters for compounds **5d** and **5f**.

|                                                  | <b>Compound 5d</b>                                                                    | <b>Compound 5f</b>                               |
|--------------------------------------------------|---------------------------------------------------------------------------------------|--------------------------------------------------|
| Empirical formula                                | C <sub>26</sub> H <sub>28</sub> N <sub>2</sub> S·0.5(C <sub>6</sub> H <sub>12</sub> ) | C <sub>29</sub> H <sub>28</sub> N <sub>2</sub> S |
| Formula weight                                   | 442.64                                                                                | 436.59                                           |
| Crystal system                                   | Monoclinic                                                                            | Triclinic                                        |
| Space group                                      | I2/a                                                                                  | P-1                                              |
| Temperature (K)                                  | 121 (2)                                                                               | 329 (2)                                          |
| a/Å                                              | 18.7865 (3)                                                                           | 7.1421 (5)                                       |
| b/Å                                              | 10.8565 (2)                                                                           | 11.6290 (8)                                      |
| c/Å                                              | 23.2644 (5)                                                                           | 15.1229 (12)                                     |
| $\alpha$ /°                                      | 90                                                                                    | 107.993 (7)                                      |
| $\beta$ /°                                       | 92.425(2)                                                                             | 99.633 (6)                                       |
| $\gamma$ /°                                      | 90                                                                                    | 95.238 (6)                                       |
| Volume/Å <sup>3</sup>                            | 1815.88 (14)                                                                          | 1163.99 (16)                                     |
| Z                                                | 8                                                                                     | 2                                                |
| $\rho_{\text{calc}}/\text{cm}^3$                 | 1.240                                                                                 | 1.246                                            |
| $\mu/\text{mm}^{-1}$                             | 1.341                                                                                 | 1.365                                            |
| F(000)                                           | 1904                                                                                  | 464                                              |
| Crystal size (mm <sup>3</sup> )                  | 0.15 × 0.10 × 0.09                                                                    | 0.30 × 0.06 × 0.03                               |
| Radiation                                        | Cu K $\alpha$ ( $\lambda$ =1.54184)                                                   |                                                  |
| Diffractometer                                   | Xcalibur, Ruby, Gemini diffractometer                                                 |                                                  |
| Absorption correction                            | Multi-scan                                                                            |                                                  |
| T <sub>min</sub> , T <sub>max</sub>              | 0.851, 0.886                                                                          | 0.906, 0.960                                     |
| 2 $\Theta$ range for data collection/°           | 3.8-74.6°                                                                             | 3.1-71.6°                                        |
| Index ranges                                     | h = -23→23, k = -13→13, l = -126→29                                                   | h = -8→7, k = -14→14, l = -18→18                 |
| Reflections collected                            | 18428                                                                                 | 17828                                            |
| Independent reflections                          | 4793                                                                                  | 4698                                             |
| Data/restraints/parameters                       | 290/0/0                                                                               | 289/0/0                                          |
| Goodness-of-fit on F <sup>2</sup>                | 1.04                                                                                  | 1.01                                             |
| Final R indexes [I >= 2 $\sigma$ (I)]            | 0.069                                                                                 | 0.054                                            |
| Final R indexes [all data]                       | 0.206                                                                                 | 0.148                                            |
| Largest diff. peak and hole (e Å <sup>-3</sup> ) | 1.16, -0.59                                                                           | 0.21, -0.19                                      |
| CCDC No.                                         | 2155510                                                                               | 2155511                                          |

**Table S2.** PASS prediction of histone deacetylase SIRT1 inhibitory activity of compounds **5a-r**.

| Comp. No. | Pa    | Pi    | Comp. No. | Pa    | Pi    |
|-----------|-------|-------|-----------|-------|-------|
| <b>5a</b> | 0,667 | 0,002 | <b>5j</b> | 0,488 | 0,003 |
| <b>5b</b> | 0,579 | 0,003 | <b>5k</b> | 0,488 | 0,003 |
| <b>5c</b> | 0,666 | 0,002 | <b>5l</b> | 0,666 | 0,002 |
| <b>5d</b> | 0,563 | 0,003 | <b>5m</b> | 0,579 | 0,003 |
| <b>5e</b> | 0,518 | 0,003 | <b>5n</b> | 0,591 | 0,002 |
| <b>5f</b> | 0,649 | 0,002 | <b>5o</b> | 0,600 | 0,002 |
| <b>5g</b> | 0,570 | 0,003 | <b>5p</b> | 0,496 | 0,003 |
| <b>5h</b> | 0,502 | 0,003 | <b>5q</b> | 0,461 | 0,003 |
| <b>5i</b> | 0,593 | 0,002 | <b>5r</b> | 0,562 | 0,003 |

Pa: probability to be active, Pi: probability to be inactive.

**Table S3.** Molecular formulae, molecular weights and elemental analyses data of compounds **5a-r**.

| Comp. No. | Mol. Formula (Mol. Wt.)                                                   | Analysis: % Calcd. (Found) |             |             |             |
|-----------|---------------------------------------------------------------------------|----------------------------|-------------|-------------|-------------|
|           |                                                                           | C                          | H           | N           | S           |
| <b>5a</b> | C <sub>25</sub> H <sub>26</sub> N <sub>2</sub> S (386.56)                 | 77.68 (77.52)              | 6.78 (6.80) | 7.25 (7.22) | 8.29 (8.25) |
| <b>5b</b> | C <sub>25</sub> H <sub>25</sub> ClN <sub>2</sub> S (421.0)                | 71.32 (71.30)              | 5.99 (6.02) | 6.65 (6.62) | 7.62 (7.61) |
| <b>5c</b> | C <sub>25</sub> H <sub>25</sub> BrN <sub>2</sub> S (465.45)               | 64.51 (64.46)              | 5.41 (5.52) | 6.02 (5.98) | 6.89 (6.88) |
| <b>5d</b> | C <sub>26</sub> H <sub>28</sub> N <sub>2</sub> S (400.58)                 | 77.96 (77.90)              | 7.05 (7.12) | 6.99 (6.75) | 8.0 (7.92)  |
| <b>5e</b> | C <sub>26</sub> H <sub>28</sub> N <sub>2</sub> OS (416.58)                | 74.96 (74.80)              | 6.78 (6.80) | 6.72 (6.68) | 7.70 (7.62) |
| <b>5f</b> | C <sub>29</sub> H <sub>28</sub> N <sub>2</sub> S (436.62)                 | 79.78 (79.76)              | 6.46 (6.50) | 6.42 (6.40) | 7.34 (7.33) |
| <b>5g</b> | C <sub>25</sub> H <sub>25</sub> FN <sub>2</sub> S (404.55)                | 74.22 (74.16)              | 6.23 (6.25) | 6.92 (6.90) | 7.92 (7.88) |
| <b>5h</b> | C <sub>25</sub> H <sub>24</sub> ClFN <sub>2</sub> S (438.99)              | 68.40 (68.23)              | 5.51 (5.50) | 6.38 (6.39) | 7.30 (7.28) |
| <b>5i</b> | C <sub>25</sub> H <sub>24</sub> BrFN <sub>2</sub> S (483.44)              | 62.11 (62.08)              | 5.0 (5.12)  | 5.79 (5.72) | 6.63 (6.62) |
| <b>5j</b> | C <sub>26</sub> H <sub>27</sub> FN <sub>2</sub> S (418.57)                | 74.61 (74.62)              | 6.50 (6.55) | 6.69 (6.62) | 7.66 (7.65) |
| <b>5k</b> | C <sub>26</sub> H <sub>27</sub> FN <sub>2</sub> OS (434.57)               | 71.86 (71.82)              | 6.26 (6.30) | 6.45 (6.32) | 7.38 (7.38) |
| <b>5l</b> | C <sub>29</sub> H <sub>27</sub> FN <sub>2</sub> S (454.61)                | 76.62 (76.50)              | 5.99 (6.08) | 6.16 (6.12) | 7.05 (7.0)  |
| <b>5m</b> | C <sub>25</sub> H <sub>25</sub> ClN <sub>2</sub> S (421.0)                | 71.32 (71.25)              | 5.99 (6.05) | 6.65 (6.65) | 7.62 (7.61) |
| <b>5n</b> | C <sub>25</sub> H <sub>24</sub> Cl <sub>2</sub> N <sub>2</sub> S (455.44) | 65.93 (65.80)              | 5.31 (5.33) | 6.15 (6.17) | 7.04 (6.98) |
| <b>5o</b> | C <sub>25</sub> H <sub>24</sub> BrClN <sub>2</sub> S (499.90)             | 60.07 (59.92)              | 4.84 (4.85) | 5.60 (5.58) | 6.41 (6.40) |
| <b>5p</b> | C <sub>26</sub> H <sub>27</sub> ClN <sub>2</sub> S (435.03)               | 71.79 (71.72)              | 6.26 (6.32) | 6.44 (6.45) | 7.37 (7.35) |
| <b>5q</b> | C <sub>26</sub> H <sub>27</sub> ClN <sub>2</sub> OS (451.03)              | 69.24 (69.25)              | 6.03 (6.08) | 6.21 (6.18) | 7.11 (7.10) |
| <b>5r</b> | C <sub>29</sub> H <sub>27</sub> ClN <sub>2</sub> S (471.06)               | 73.94 (73.82)              | 5.78 (5.80) | 5.95 (5.86) | 6.81 (6.80) |

# NMR Spectra

## Compound 5a

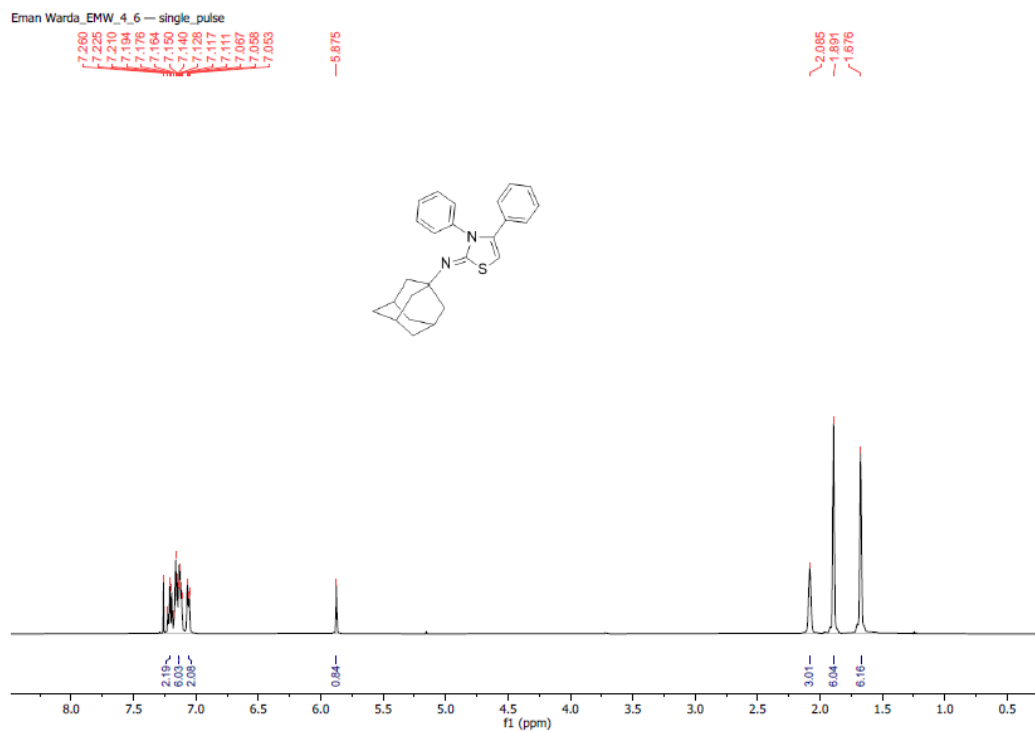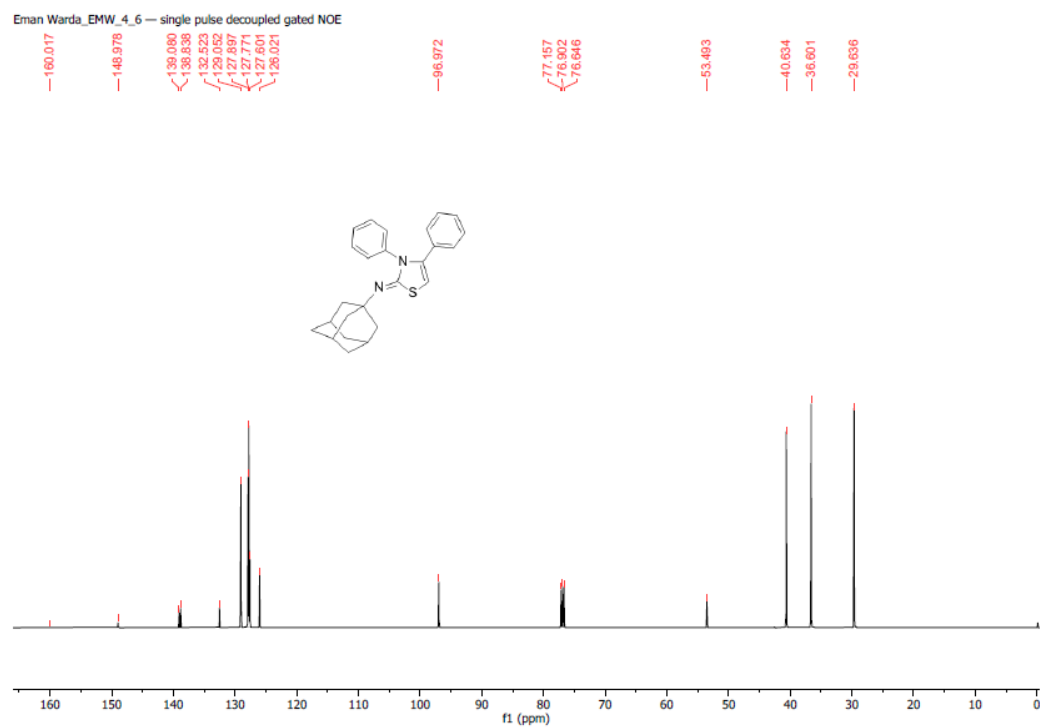

# Compound 5b

Eman warda-EMW4-1-Hnmr-ow.10.fid — Eman warda-EMW4-1-Hnmr

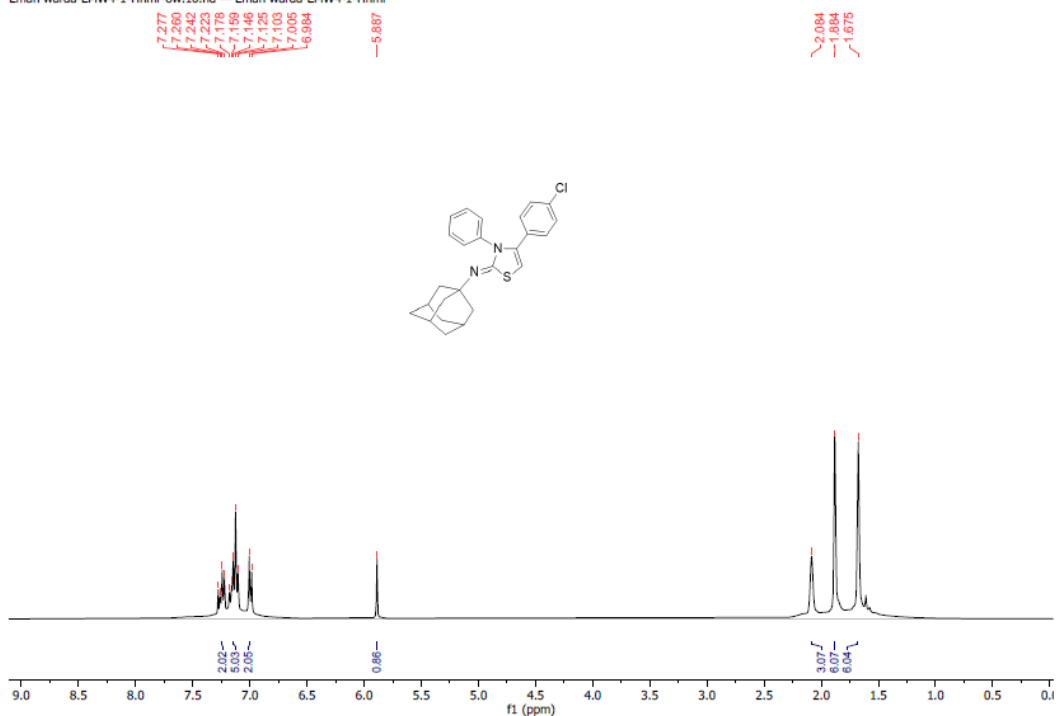

eman warda 4-1 -M c13 over night re.10.fid — eman warda 4-1 -M c13 over night re

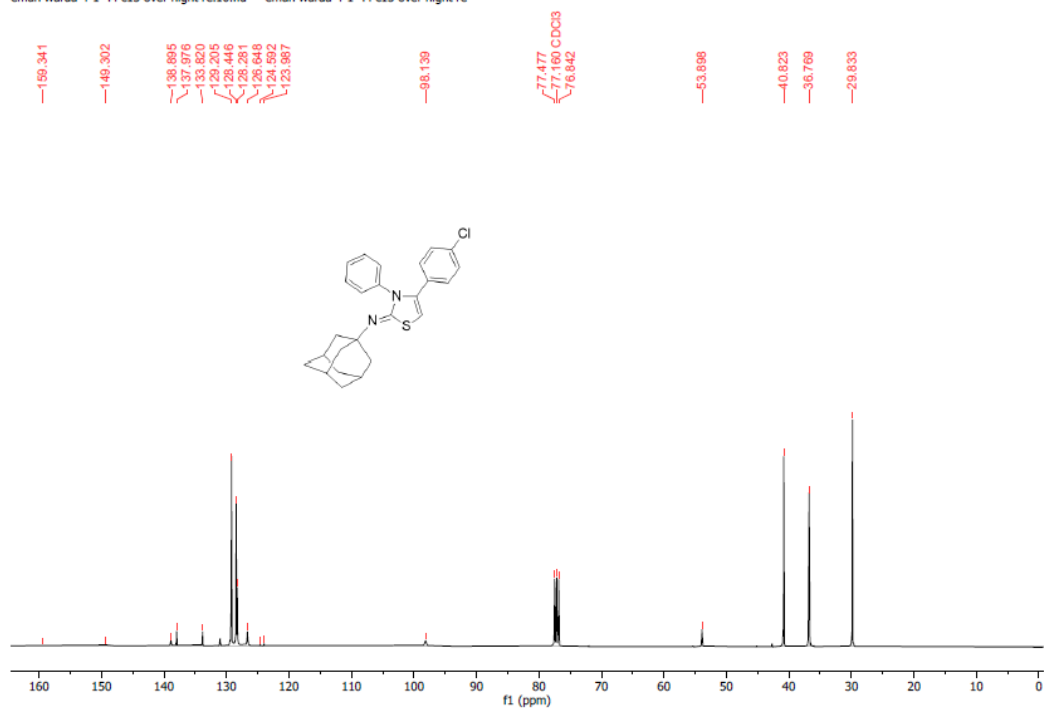

# Compound 5c

Eman warda- EMW 4-2-Hnmr-ow.10.fid — Eman warda- EMW 4-2-Hnmr

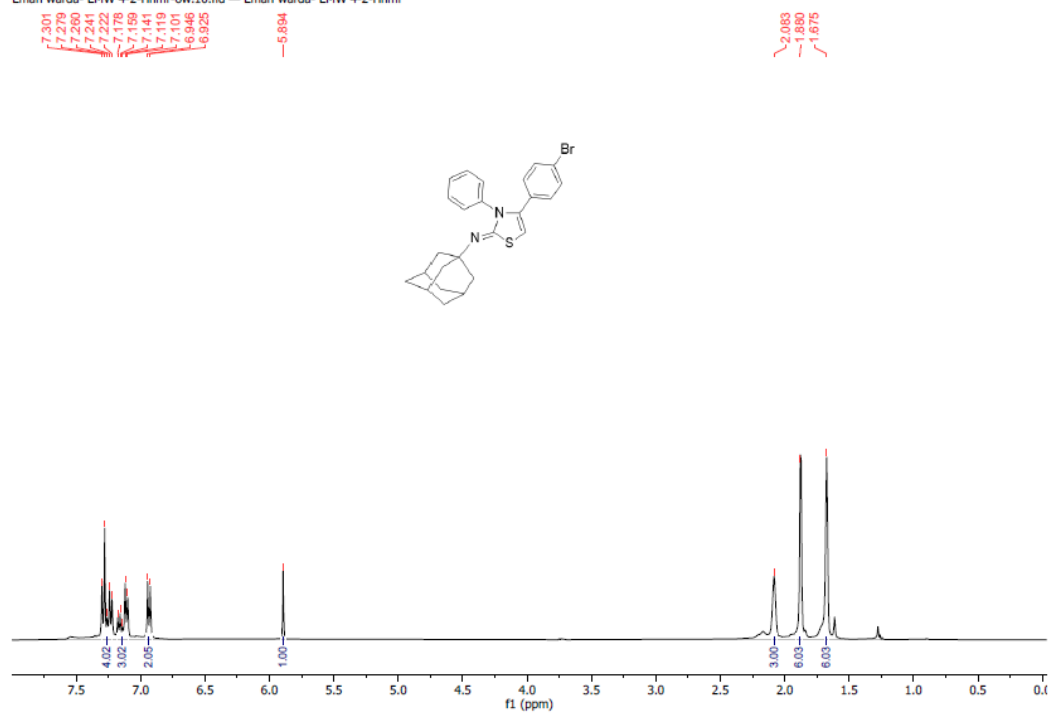

Eman Warda-EMW4-2-carbon-WH.10.fid — Eman Warda-EMW4-2-carbon-WH

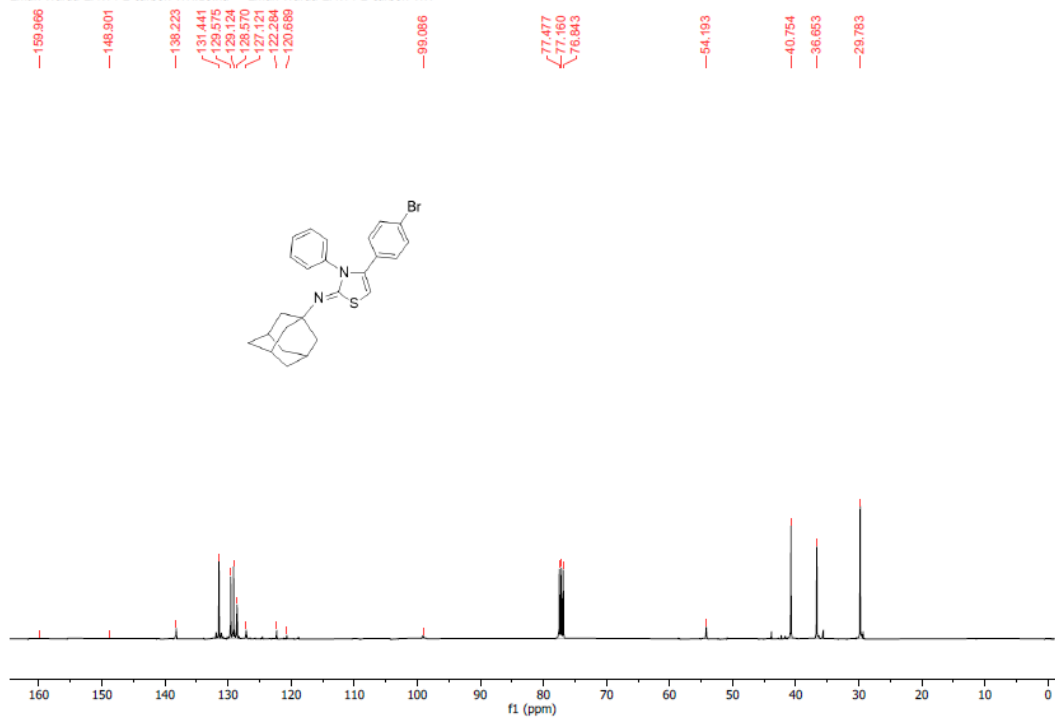

# Compound 5d

Eman Warda-EMW4-3-AS-proton.10.fid — Eman Warda-EMW4-3-AS-proton

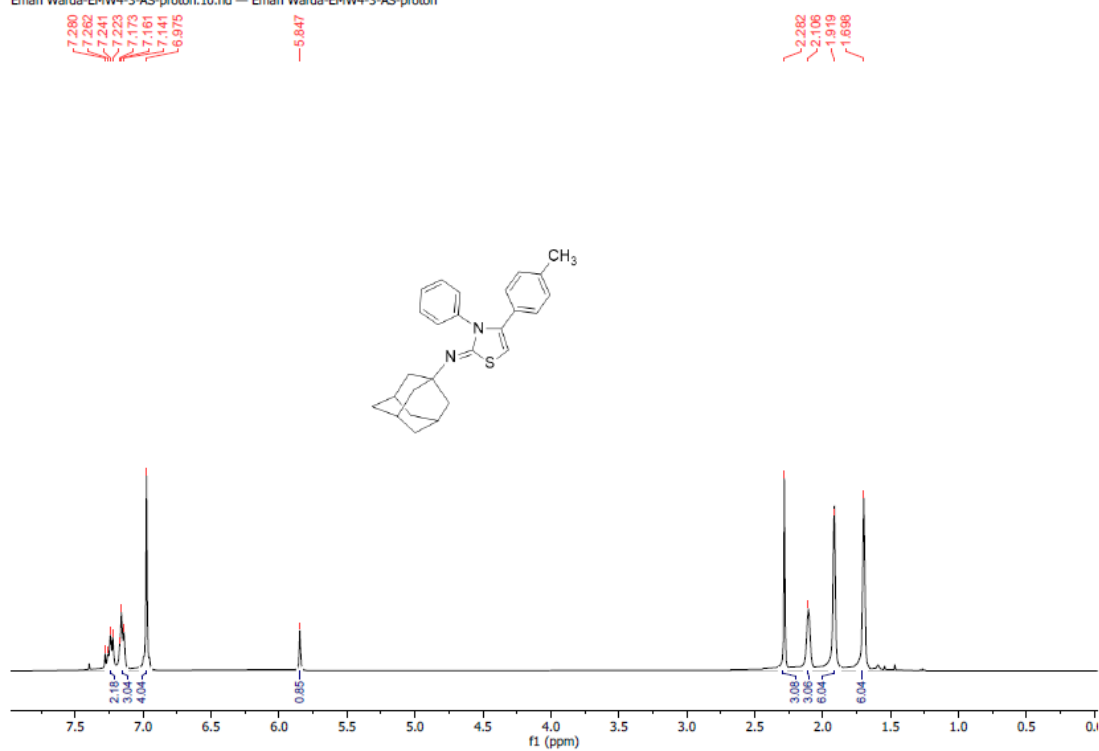

eman warda-EMW-4-3- carbon-SA.10.fid — eman warda-EMW-4-3-carbon-SA

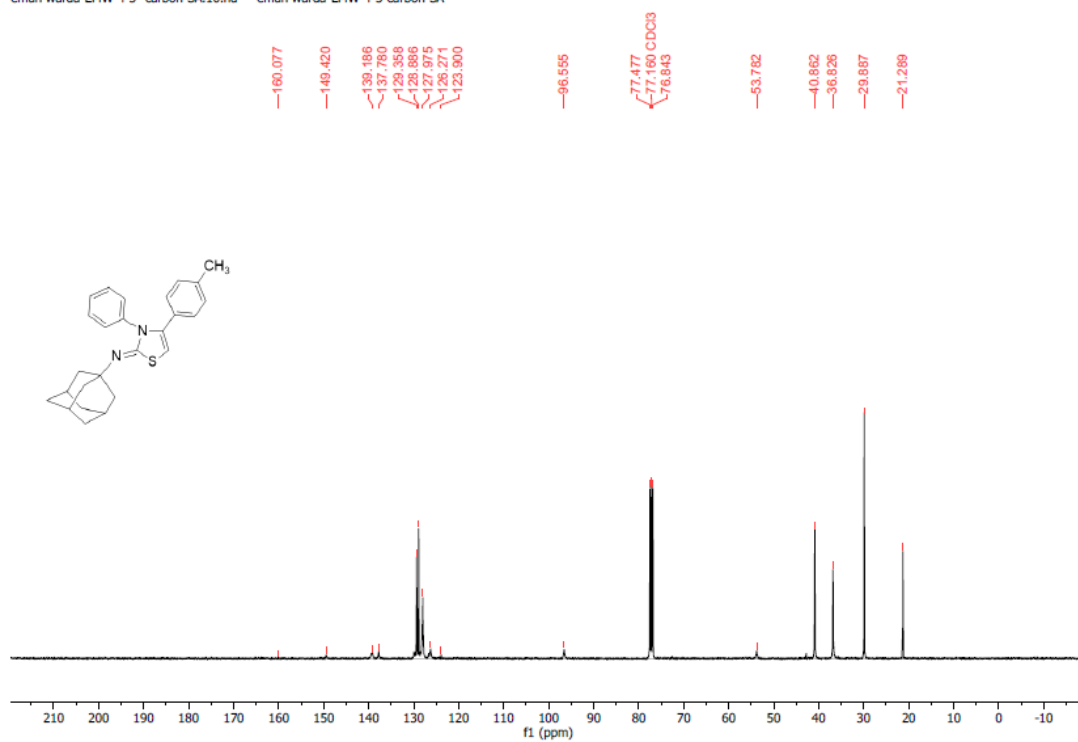

# Compound 5e

Eman Warda-EMW4-4-AS-proton.10.fid — Eman Warda-EMW4-4-AS-proton

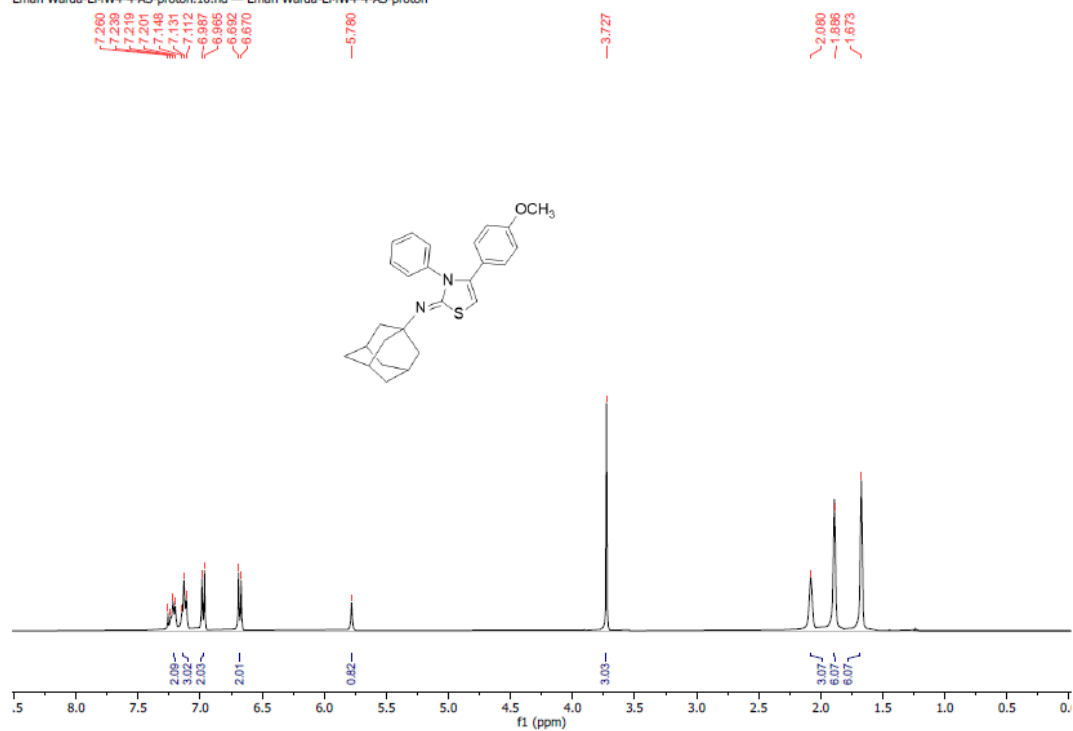

eman warda-EMW-4-4-carbon-SA.10.fid — eman warda-EMW-4-4-carbon-SA

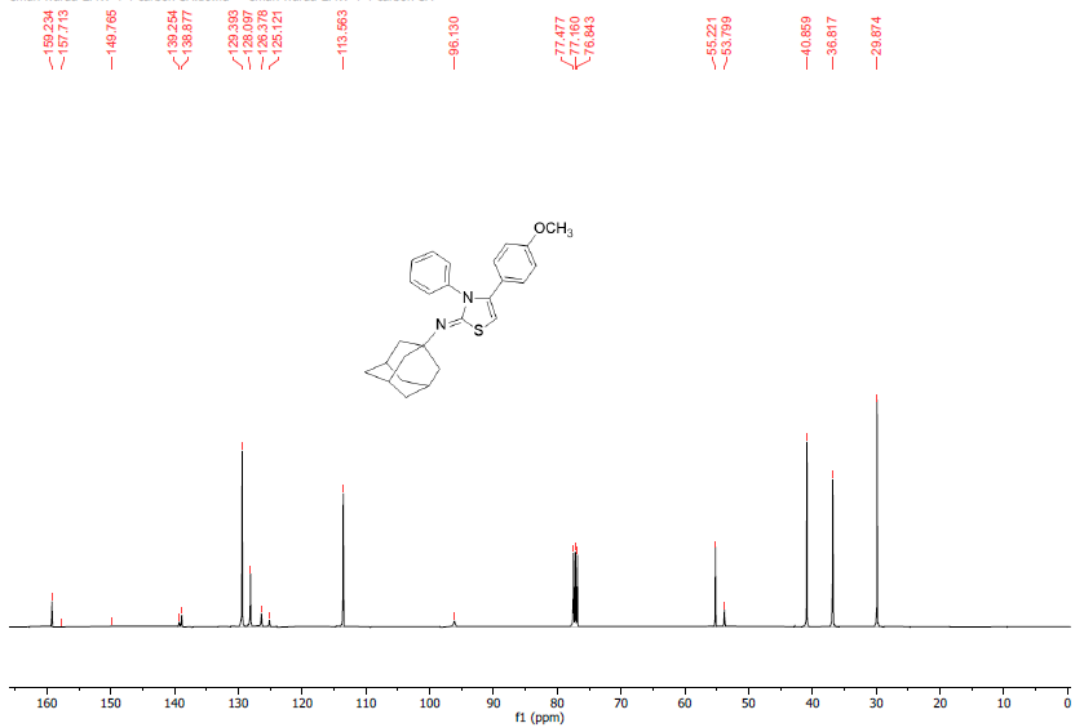



# Compound 5f

Eman Warda-EMW4-5-AS-proton.10.fid — Eman Warda-EMW4-5-AS-proton

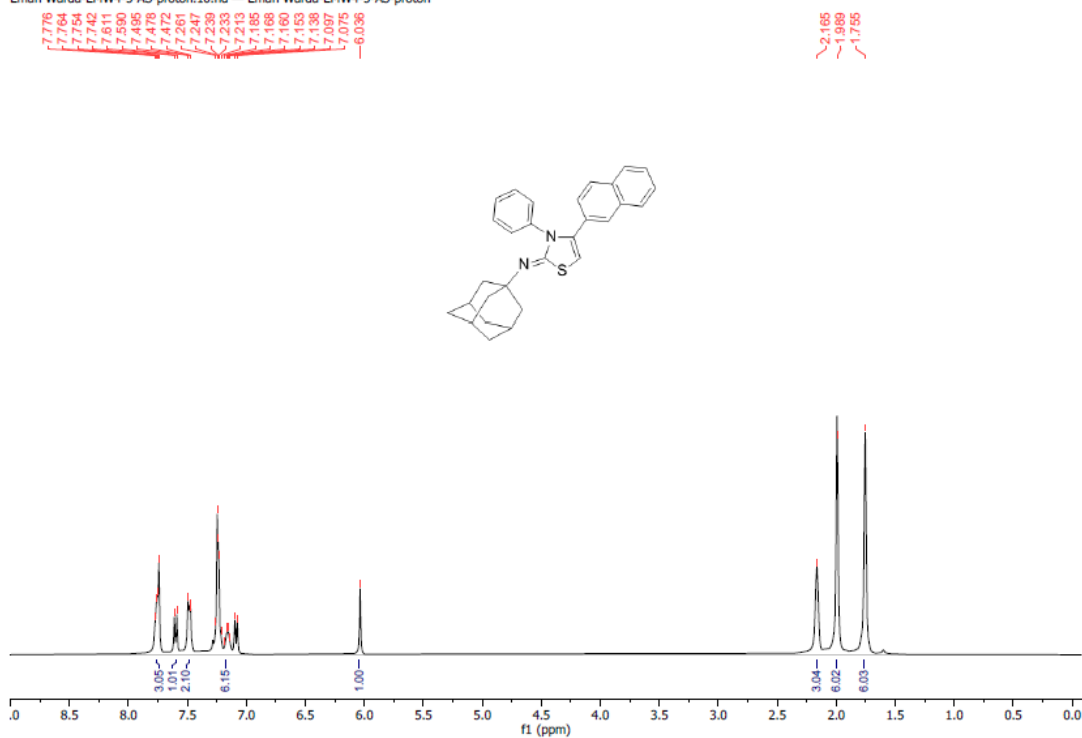

eman warda-EMW-4-5-carbon-SA.10.fid — eman warda-EMW-4-5-carbon-SA

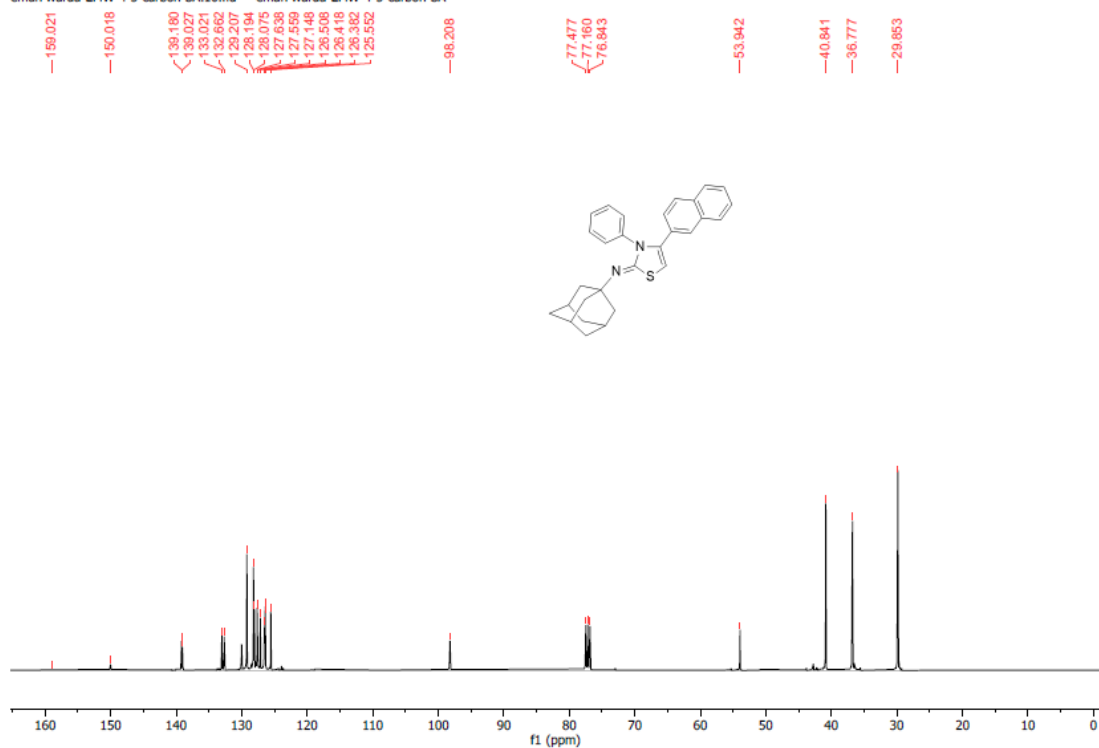

# Compound 5g

Eman Warda\_EMW\_3\_7 — single\_pulse

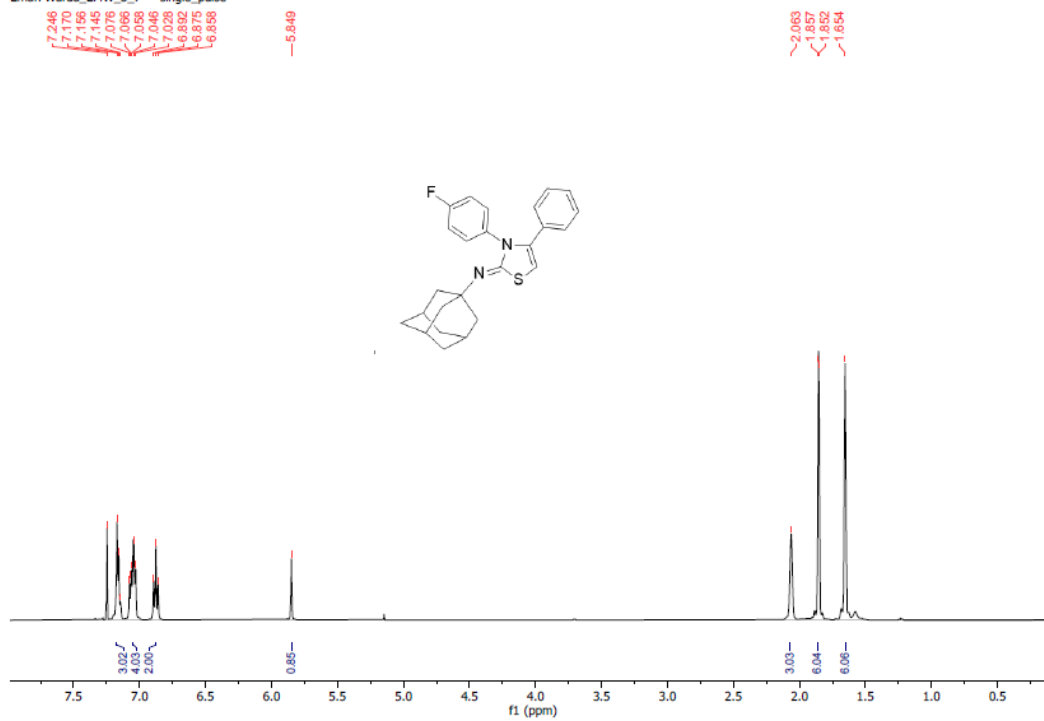

# Compound 5h

Eman Warda\_EMW\_F — single\_pulse

7.261  
7.162  
7.154  
7.144  
7.138  
7.070  
7.059  
7.052  
7.042  
6.989  
6.984  
6.983  
6.982  
6.927  
6.910  
6.892  
— 5.868

2.067  
1.847  
1.841  
1.656

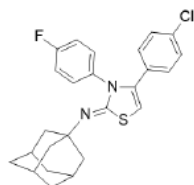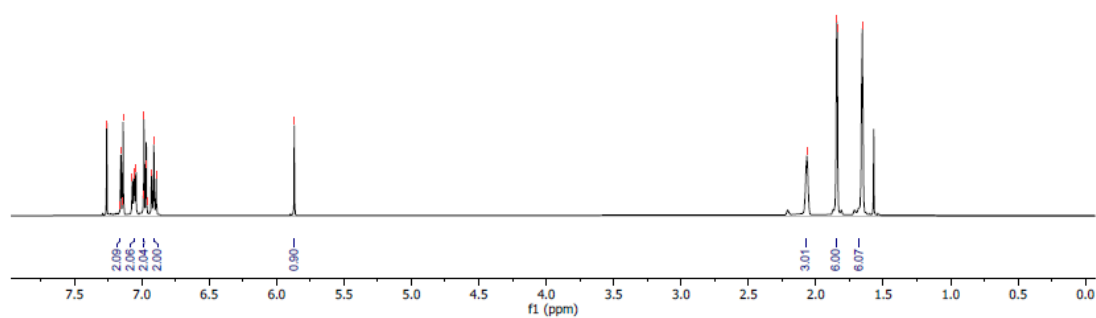

Eman Warda\_EMW\_F — single\_pulse decoupled gated NOE

161.949  
159.986  
149.755  
137.868  
134.775  
134.089  
130.808  
130.740  
129.292  
129.109  
128.796  
128.613  
115.370  
115.188  
98.203  
77.407  
77.153  
76.801  
53.989  
40.884  
36.755  
29.837

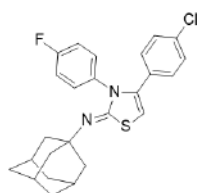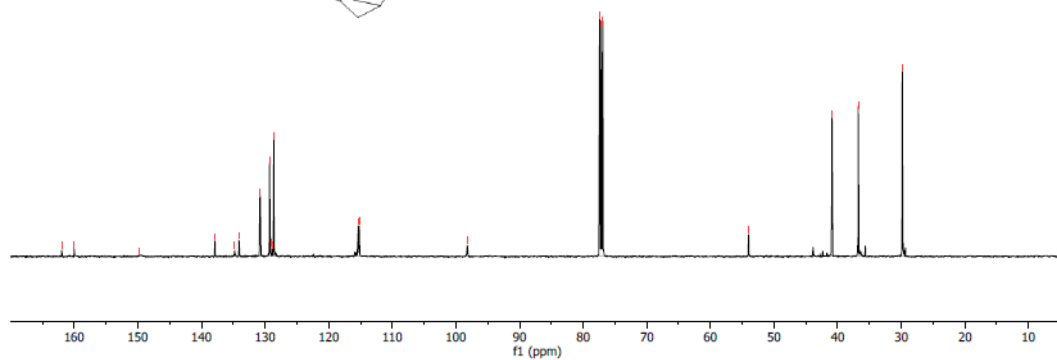

# Compound 5i

Eman warda-EMW 3-4-Hnmr-ow.10.fid — Eman warda-EMW 3-4-Hnmr

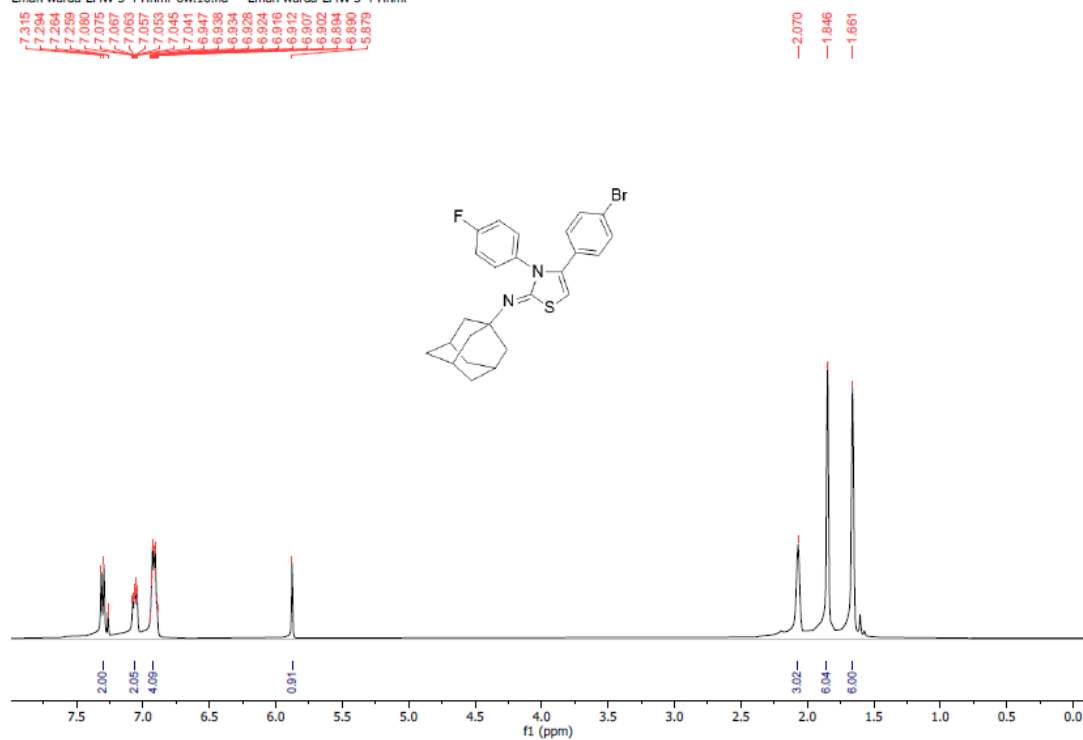

Eman Warda-EMW3-4-EM.10.fid — Eman Warda-EMW3-4-EM

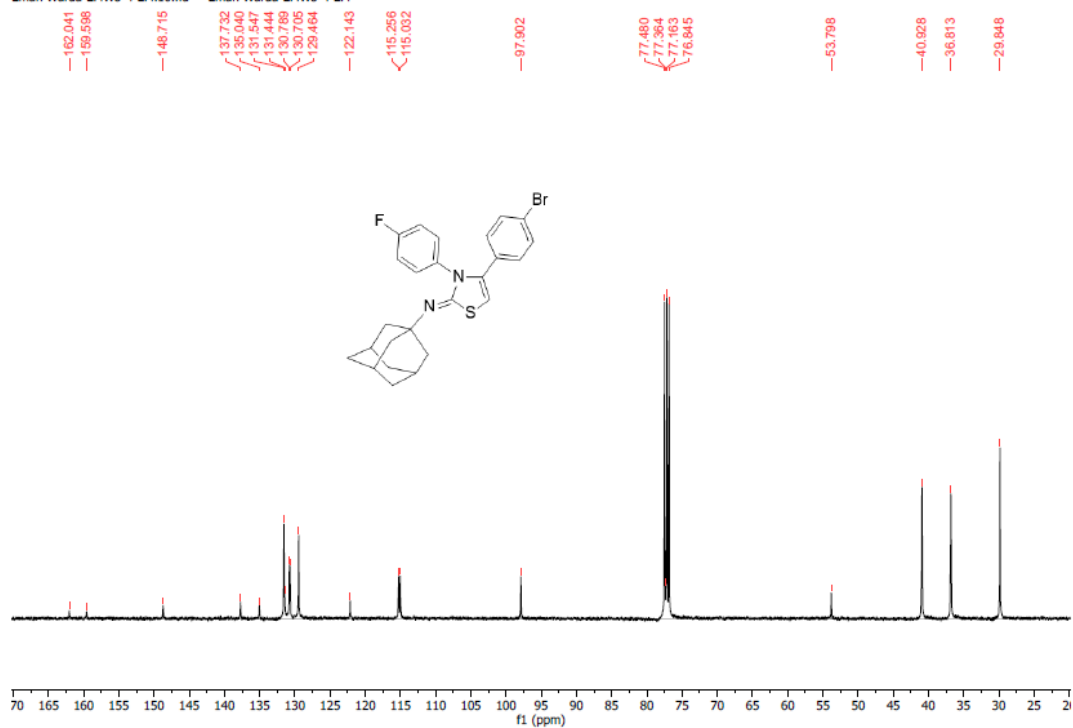

# Compound 5j

Eman Warda-EMW3-2-AS-proton.10.fid — Eman Warda-EMW3-2-AS-proton

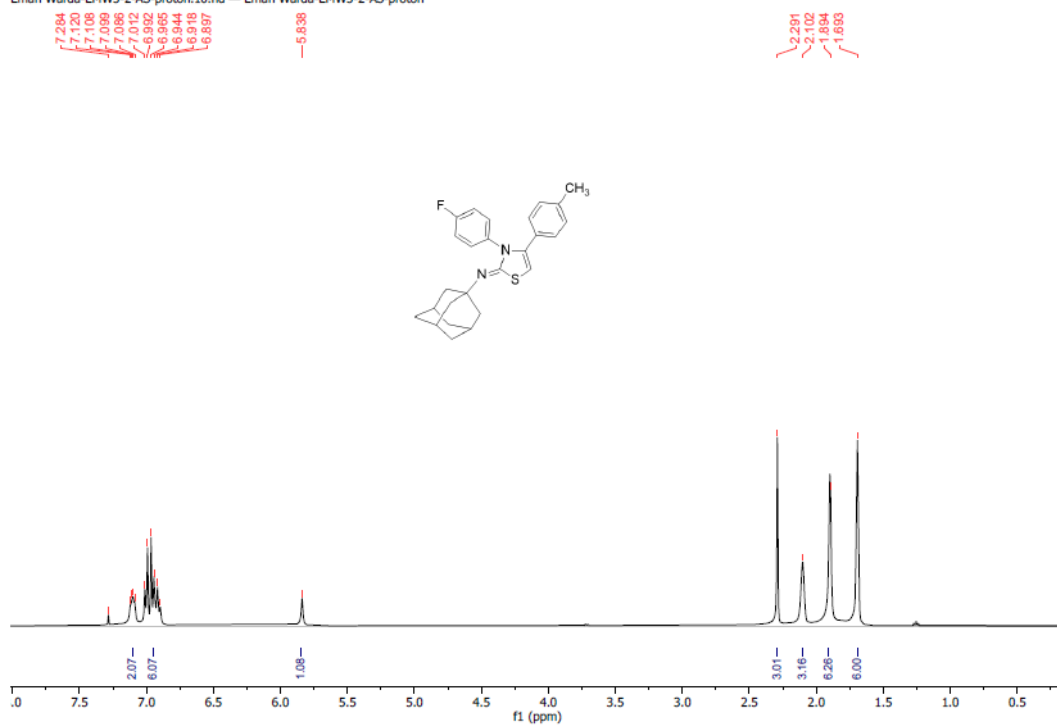

eman warda-EMW-3-2-carbon-SA.10.fid — eman warda-EMW-3-2-carbon-SA

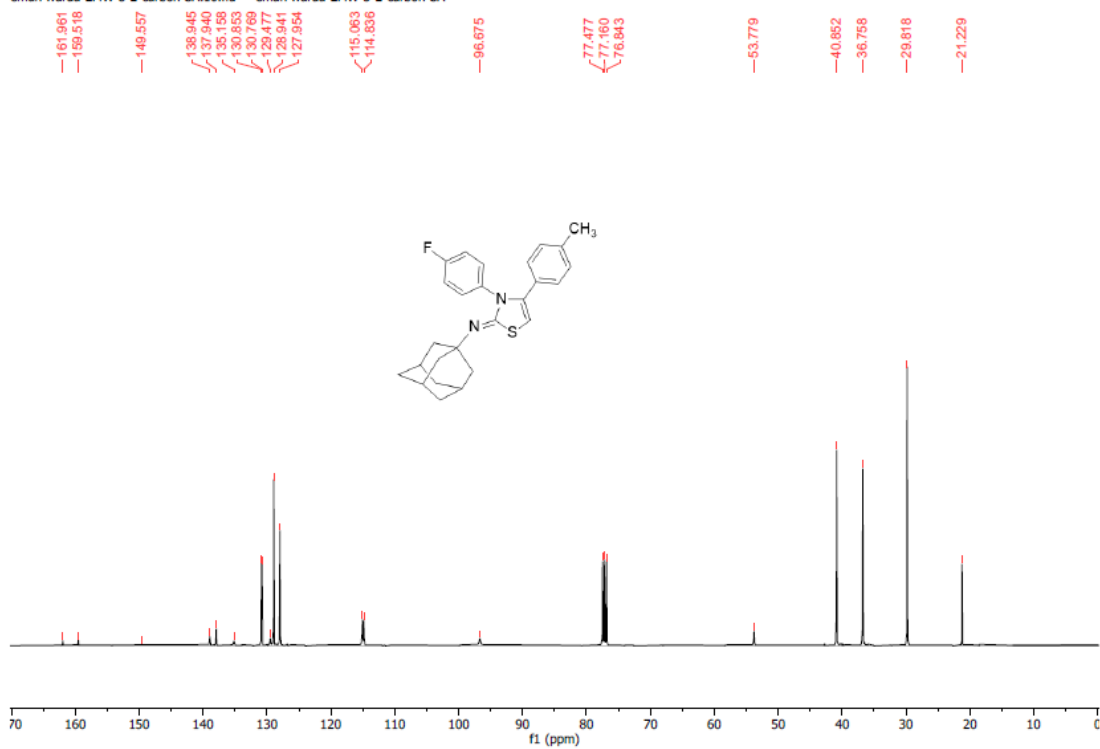

### Compound **5k**

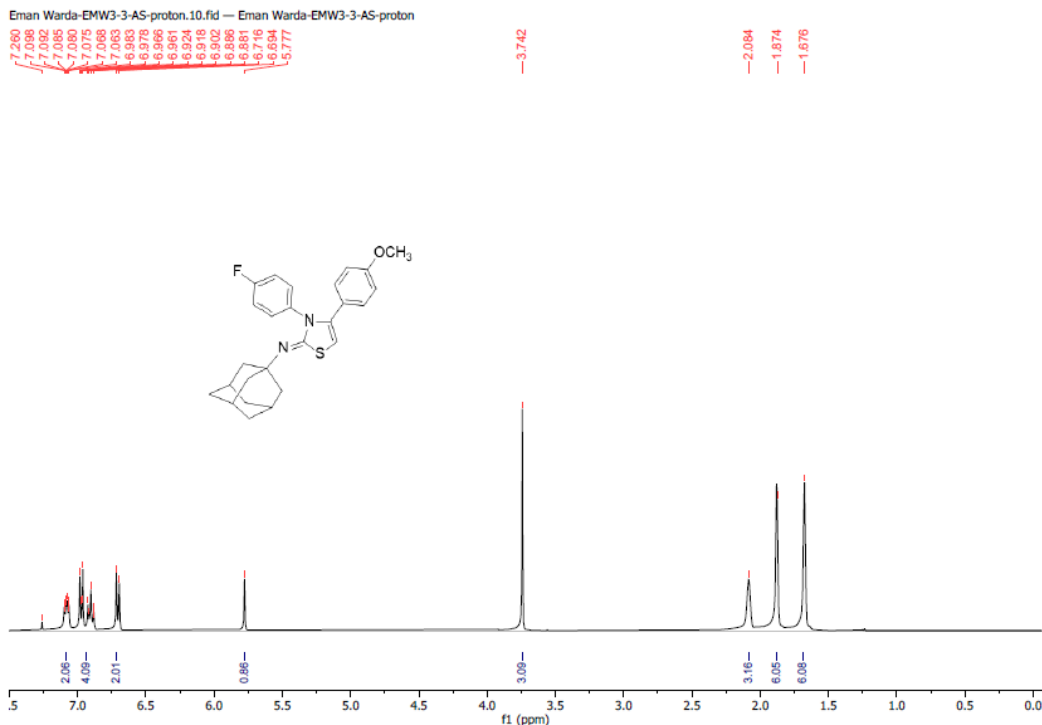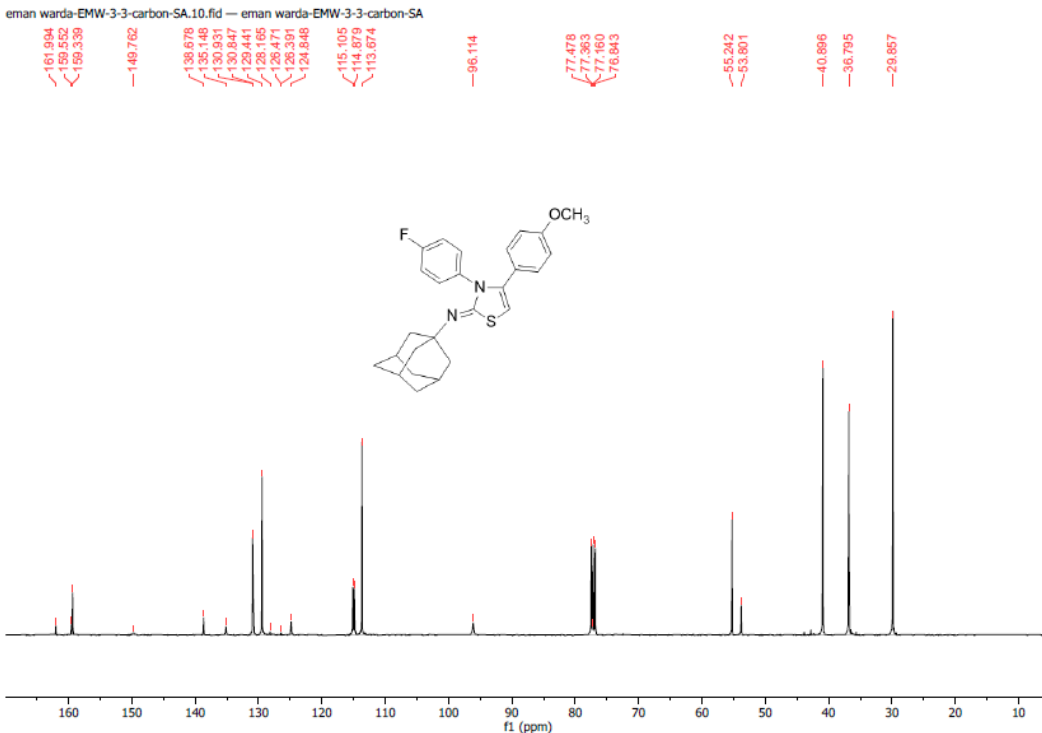

# Compound 5l

Eman Warda\_EMW 3\_5 — single\_pulse

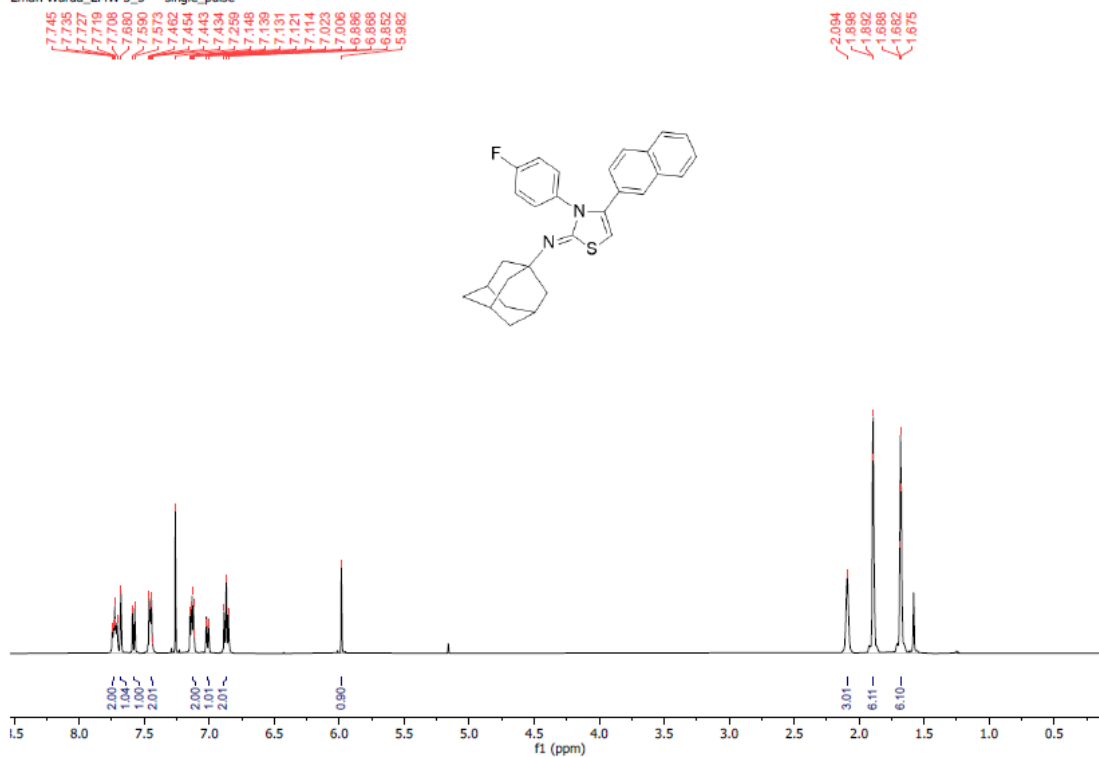

Eman Warda\_EMW 3\_5 — single\_pulse decoupled gated NOE

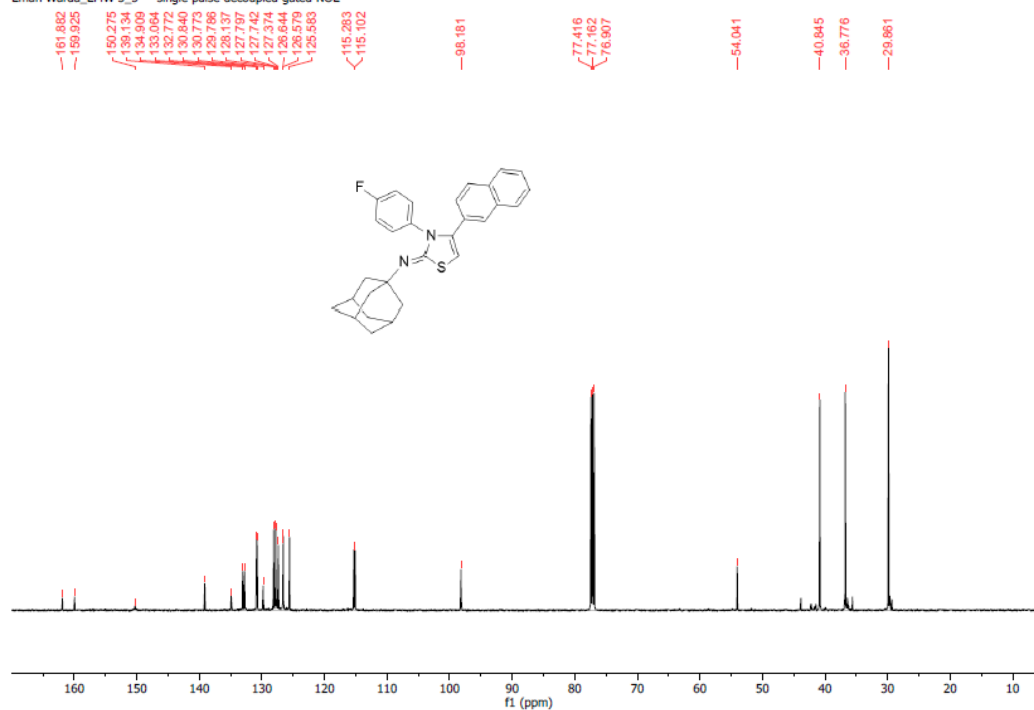

# Compound 5m

Eman Warda\_EMW 5\_3 — single\_pulse

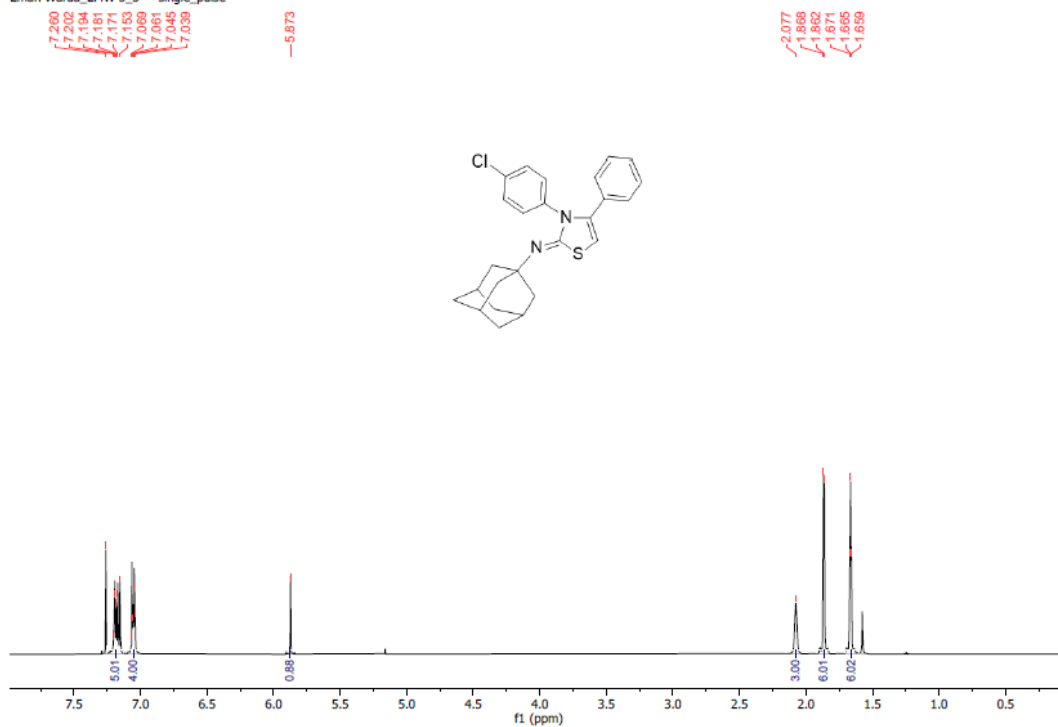

Eman Warda\_EMW 5\_3 — single\_pulse decoupled gated NOE

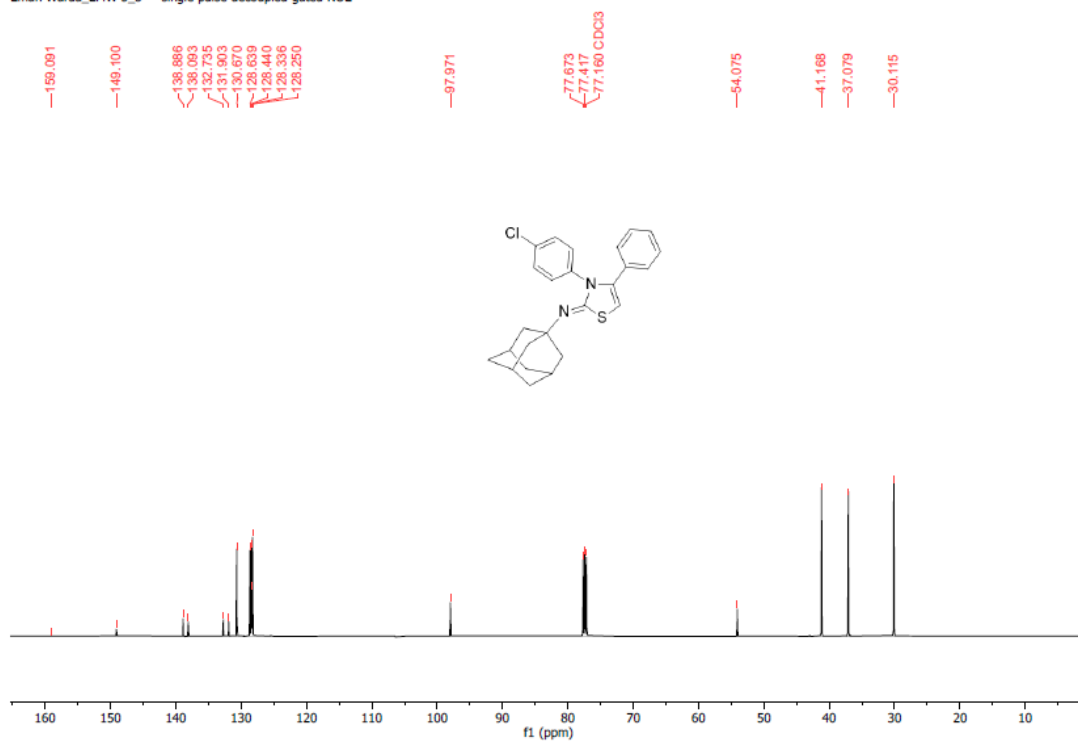



# Compound 5n

eman warda- EMW5-2-HNMR-NM.10.fid — eman warda- EMW5-2-HNMR

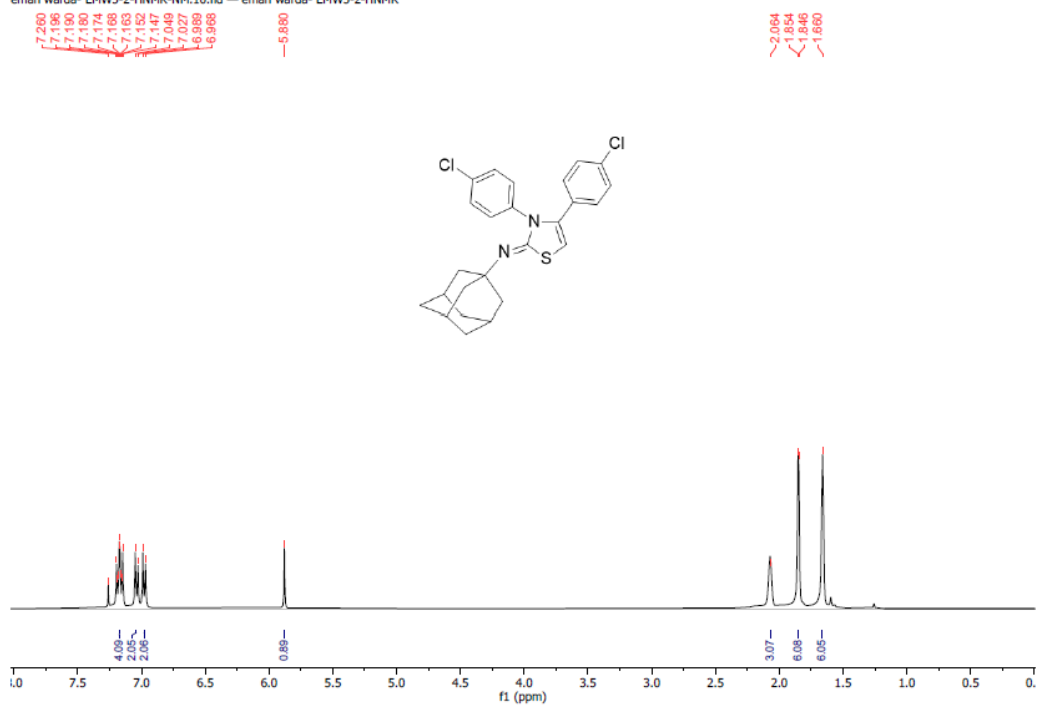

Eman warda-EMM5-2-carbon-ES.10.fid — Eman warda-EMM5-2-carbon-ES

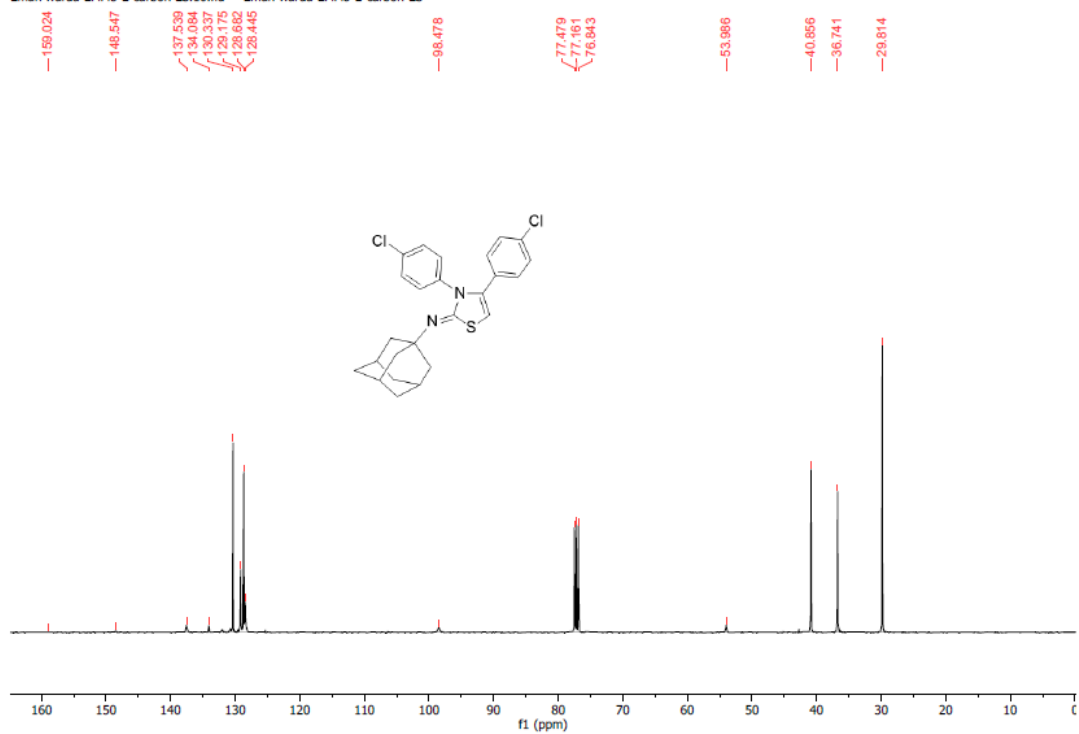

# Compound 5o

eman warda- EMW5-1-HNMR-NM.10.fid — eman warda- EMW5-1-HNMR

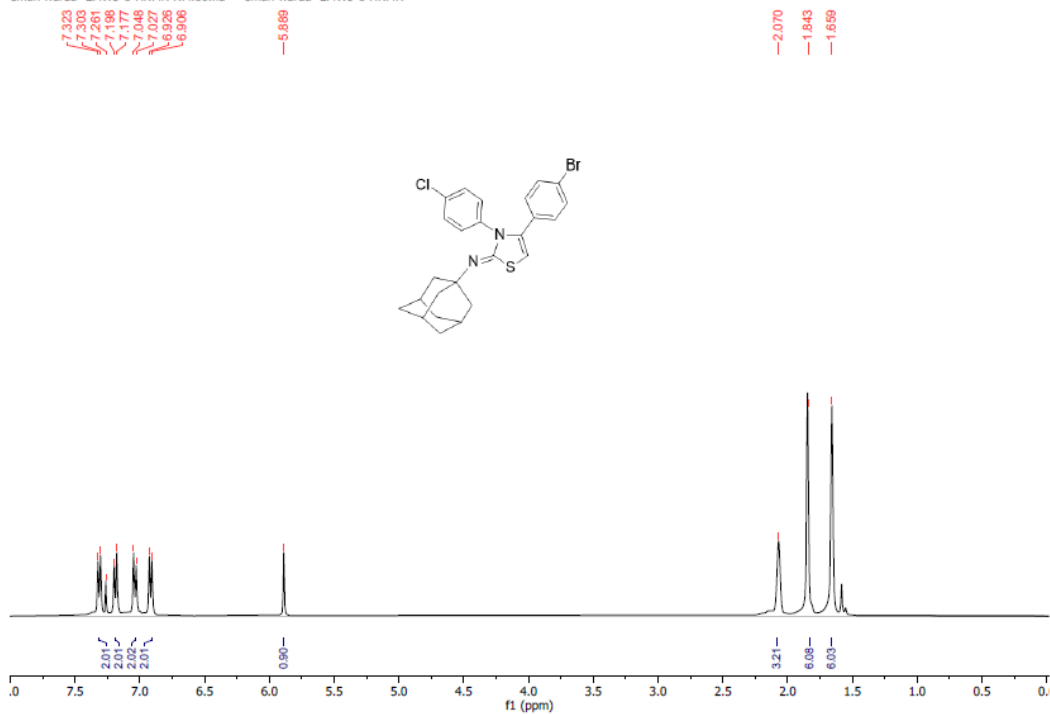

Eman warda-EMM5-1-carbon-ES.10.fid — Eman warda-EMM5-1-carbon-ES

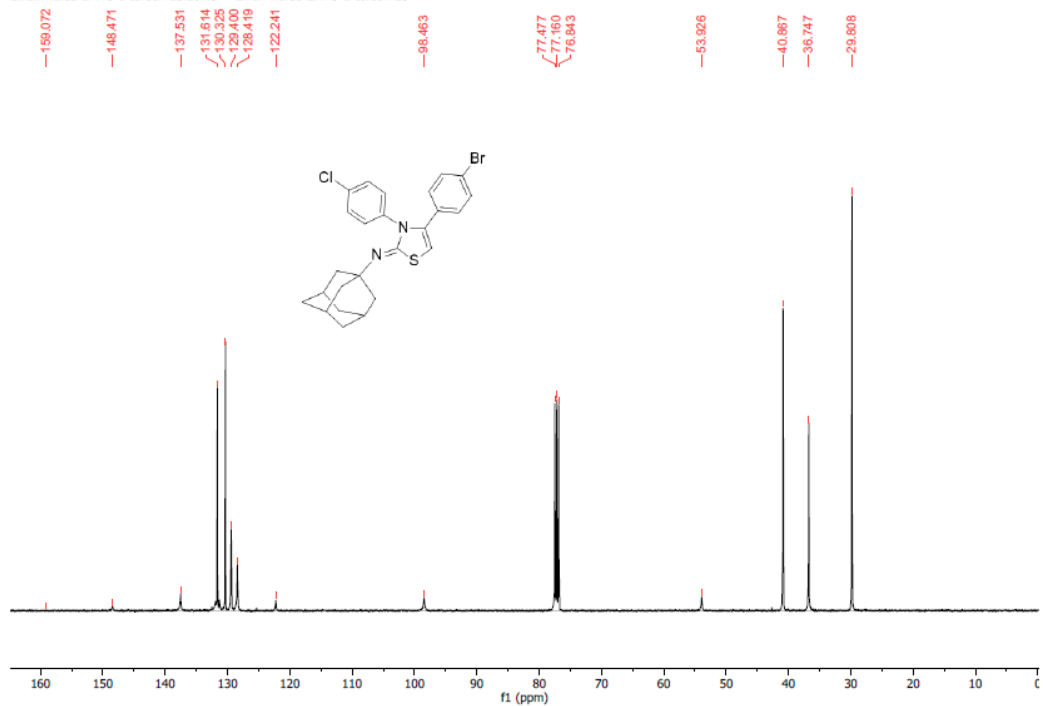

# Compound 5p

Eman Warda\_EMW 5\_5 — single\_pulse

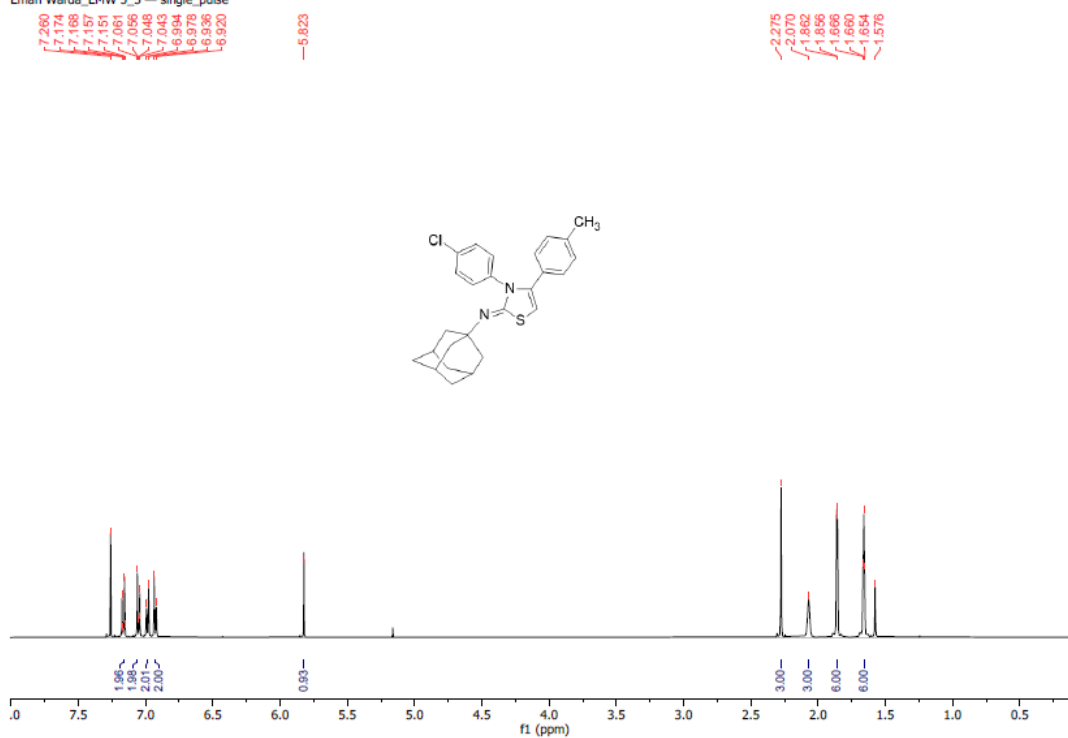

# Compound 5q

Eman Warda\_EMW 5\_6 — single\_pulse

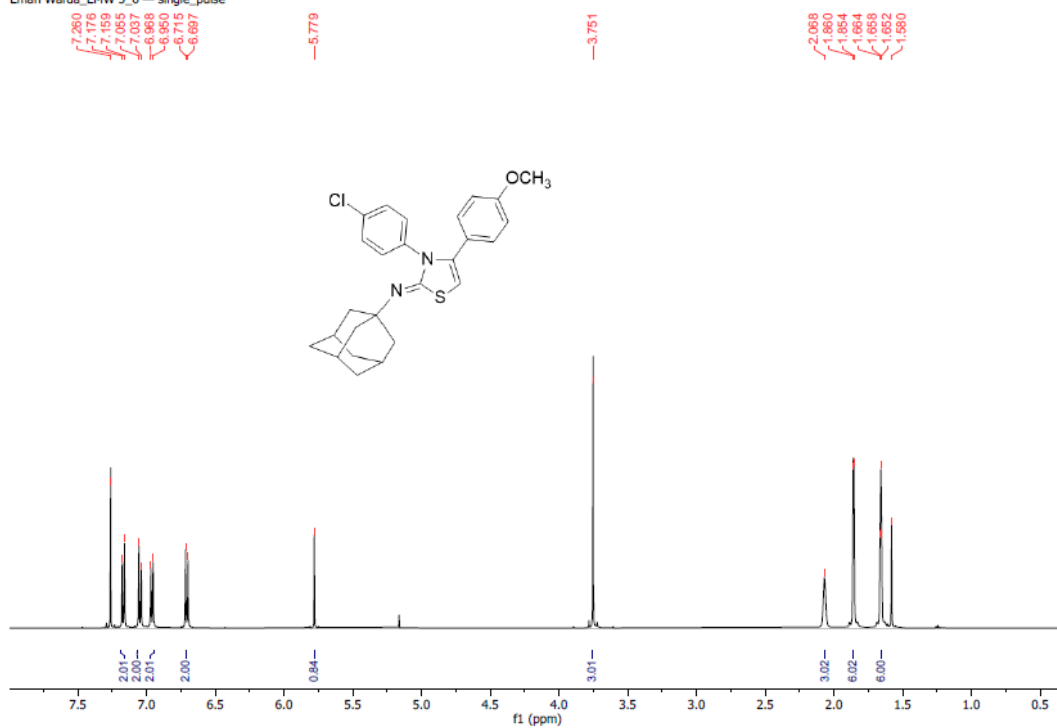

# Compound 5r

Eman Warda\_EMW 5\_4 — single pulse decoupled gated NOE

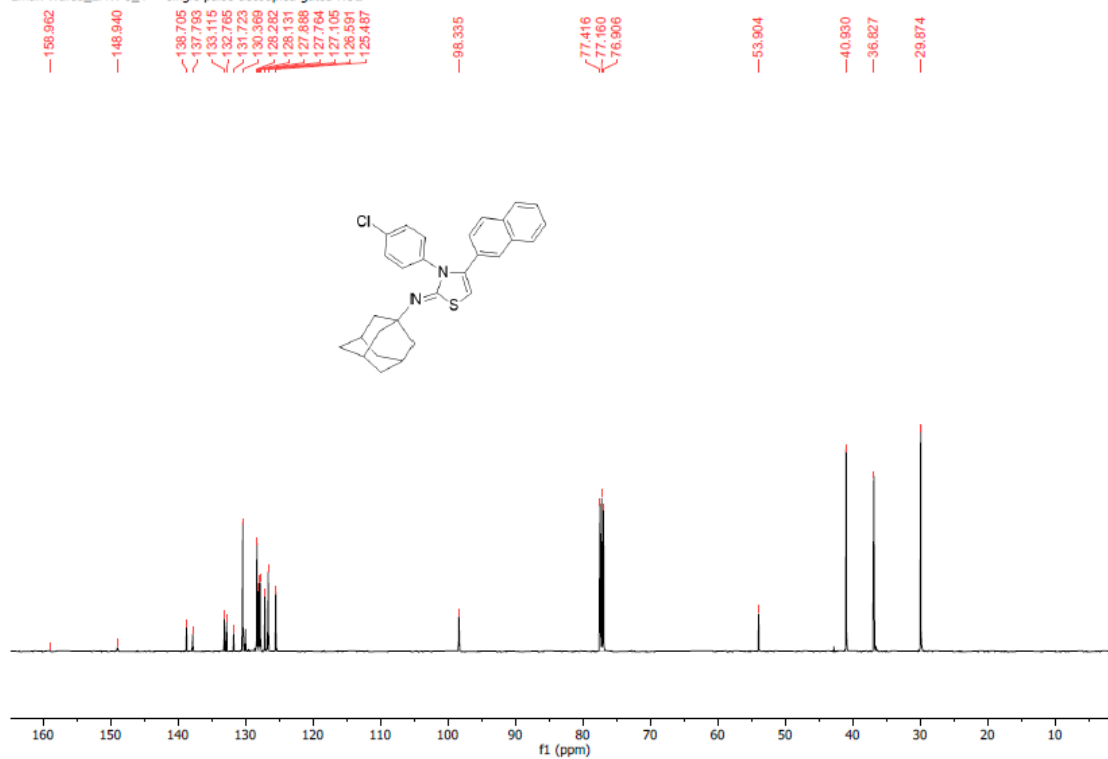

Eman Warda\_EMW 5\_4 — single pulse decoupled gated NOE

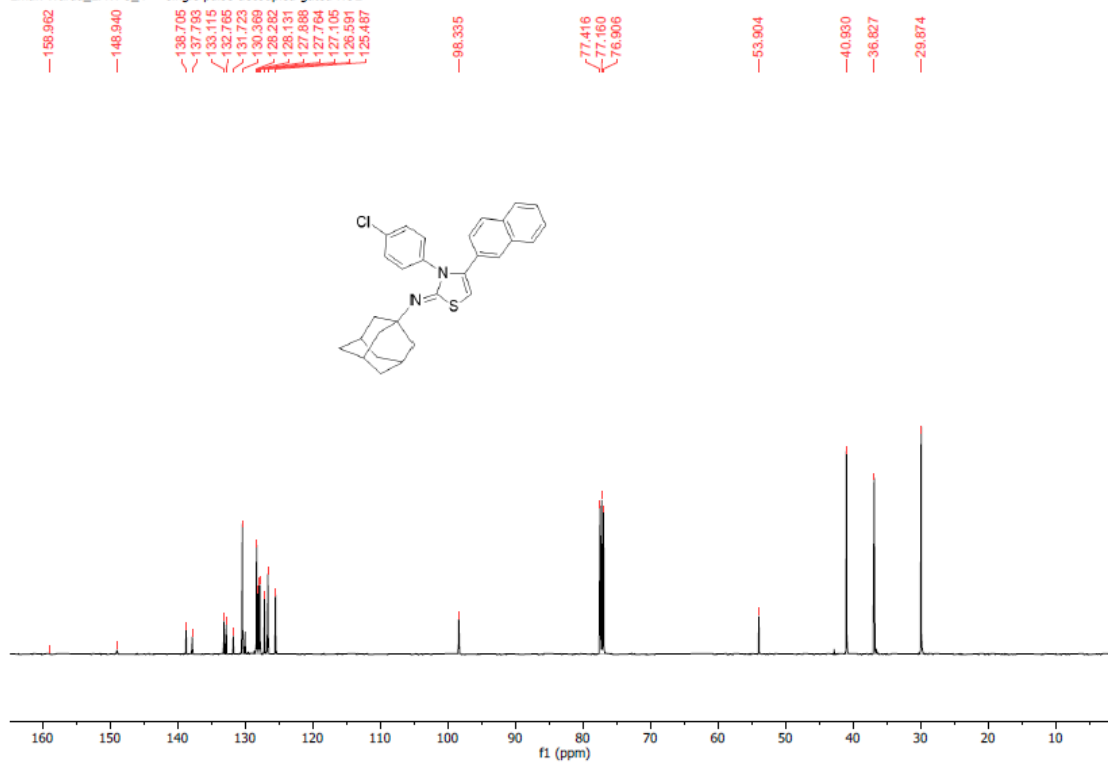

#### **Determination of antimicrobial activity of compounds 5a-r (agar disc-diffusion method)**

Sterile filter paper discs (8 mm diameter) were moistened with compounds **5a-r** solution in dimethyl sulphoxide of specific concentration (200 µg/disc), the broad-spectrum antibacterial drugs Ampicillin trihydrate, Ciprofloxacin and the antifungal drug Fluconazole (100 µg/disc) were carefully placed on the agar culture plates that had been previously inoculated separately with the microorganisms. The plates were incubated at 37 °C, and the diameter of the growth inhibition zones were measured after 24 hours in case of bacteria and 48 hours in case of fungi.

#### **Determination of minimal inhibitory concentrations (MIC) and the minimal biocidal concentrations (MBC) for compounds 5a, 5c, 5g, 5l, 5m, 5o and 5q (micro-dilution susceptibility method)**

Compounds **5a, 5c, 5g, 5l, 5m, 5o** and **5q**, Ampicillin trihydrate, Ciprofloxacin and Fluconazole were dissolved in dimethylsulphoxide at concentration of 128 µg/mL. Two-fold dilutions of the solution were prepared (128, 64, 32, ..., 0.5 µg/mL). The microorganism suspensions at 10<sup>6</sup> CFU/mL (colony forming unit/ml) concentrations were inoculated to the corresponding wells. The plates were incubated at 36 °C for 24 and 48 hours for the bacteria and *Candida albicans*, respectively. The MIC values were determined as the lowest concentration that completely inhibited visible growth of the microorganism as detected by unaided eye. The MBC values were determined by the lowest concentration that killed of the microorganism by re-cultured on agar medium to verify the absence of growth.

#### **Determination of bacterial biofilm inhibitory activity of compounds 5a, 5c, 5l and 5o (crystal violet staining method).**

The effect of the synthesized compounds on biofilm formation was assessed in 96-well polystyrene plates. *Staphylococcus aureus* IFO 3060 and *Micrococcus luteus* IFO 3232 cells were inoculated into tryptone soy broth (TSB), after static incubation, cultures were vortexed, diluted 1:100 in TSB a final concentration 10<sup>6</sup> CFU/mL for biofilm formation and were cultured statically with or without the compounds **5a, 5c, 5l** and **5o** for 24 hours at 37 °C. Then, non-adherent bacteria were detached by washing with sterile phosphate-buffered saline (PBS), and adherent bacteria were stained for 15 minutes with a 1% crystal violet solution. After 30 minutes. Then, 100 µL dissolving solution (30% methanol and 10% acetic acid) was added to each well to dissolve the crystal violet, and the optical density (OD) was measured at 570 nm using a microplate reader. The wells

containing medium supplemented with PBS were used as negative controls. Erythromycin, was used as a positive control. The intensity of staining is directly proportional to the number of biofilm adhering to the 96-well plate. The biofilm inhibition rate was calculated as follows:

$$\% \text{ Bacterial biofilm inhibition} = [(OD \text{ of control} - OD \text{ of test compound} / OD \text{ of control})] \times 100$$

The IC<sub>50</sub> is the lowest concentrations of tested compounds that exhibited 50% inhibition on the biofilm formation.

#### **Determination of *in vitro* anti-proliferative activity (MTT assay)**

The tumor cells (3000 cells per well) were cultured and seeded into 96-well plates and the plates were incubated for 24 hours. The cells were then treated with compounds **5a-r** and Doxorubicin at different concentrations in dimethyl sulfoxide (0.1  $\mu$ M to 100  $\mu$ M) at 37 °C in an atmosphere of 5% CO<sub>2</sub> for 48 hours. Freshly prepared 3-[4,5-dimethylthiazoyl-2-yl]-2,5-diphenyltetrazolium bromide (MTT) was added to each well at a terminal concentration of 5  $\mu$ g/mL and incubated with cells at 37 °C for 4 hours. The formazan crystals were dissolved in 100  $\mu$ L of dimethyl sulfoxide in each well, and the absorbency at 492 nm (for absorbance of MTT formazan) and 630 nm (for the reference wavelength) was measured with an enzyme linked immunosorbent assay (ELISA) reader (ChroMate-4300, FL, USA). All compounds were tested three times in each of the cell lines. The IC<sub>50</sub> values were calculated according to the equation for Boltzmann sigmoidal concentration response curve using the nonlinear regression fitting models (Graph Pad, Prism Version 5). The results reported are means of three separate experiments. Statistical differences were analysed according to one-way ANOVA test wherein the differences were considered to be significant at  $p < 0.05$ .

## checkCIF/PLATON report

Structure factors have been supplied for datablock(s) EMW-3

THIS REPORT IS FOR GUIDANCE ONLY. IF USED AS PART OF A REVIEW PROCEDURE FOR PUBLICATION, IT SHOULD NOT REPLACE THE EXPERTISE OF AN EXPERIENCED CRYSTALLOGRAPHIC REFEREE.

No syntax errors found.      CIF dictionary      Interpreting this report

### Datablock: EMW-3

---

|                        |                            |                            |               |
|------------------------|----------------------------|----------------------------|---------------|
| Bond precision:        | C-C = 0.0051 A             | Wavelength=1.54184         |               |
| Cell:                  | a=18.7865 (3)              | b=10.8565 (2)              | c=23.2644 (5) |
|                        | alpha=90                   | beta=92.425 (2)            | gamma=90      |
| Temperature:           | 121 K                      |                            |               |
|                        | Calculated                 | Reported                   |               |
| Volume                 | 4740.66 (15)               | 4740.66 (15)               |               |
| Space group            | I 2/a                      | I 2/a                      |               |
| Hall group             | -I 2ya                     | -I 2ya                     |               |
| Moiety formula         | C26 H28 N2 S, 0.5 (C6 H12) | C26 H28 N2 S, 0.5 (C6 H12) |               |
| Sum formula            | C29 H34 N2 S               | C29 H34 N2 S               |               |
| Mr                     | 442.64                     | 442.64                     |               |
| Dx, g cm <sup>-3</sup> | 1.240                      | 1.240                      |               |
| Z                      | 8                          | 8                          |               |
| Mu (mm <sup>-1</sup> ) | 1.341                      | 1.341                      |               |
| F000                   | 1904.0                     | 1904.0                     |               |
| F000'                  | 1911.09                    |                            |               |
| h, k, lmax             | 23, 13, 29                 | 23, 13, 29                 |               |
| Nref                   | 4882                       | 4882                       |               |
| Tmin, Tmax             | 0.851, 0.886               | 0.851, 0.886               |               |
| Tmin'                  | 0.818                      |                            |               |

Correction method= # Reported T Limits: Tmin=0.851 Tmax=0.886  
AbsCorr = MULTI-SCAN

Data completeness= 1.000      Theta (max)= 74.813

|                                |                   |
|--------------------------------|-------------------|
| R(reflections)= 0.0688 ( 3722) | wR2(reflections)= |
| S = 1.041                      | 0.2061 ( 4793)    |
| Npar= 290                      |                   |



---

The following ALERTS were generated. Each ALERT has the format

**test-name\_ALERT\_alert-type\_alert-level.**

Click on the hyperlinks for more details of the test.

---

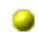

### Alert level C

|                   |                                                 |     |             |
|-------------------|-------------------------------------------------|-----|-------------|
| PLAT243_ALERT_4_C | High 'Solvent' Ueq as Compared to Neighbors of  | C29 | Check       |
| PLAT260_ALERT_2_C | Large Average Ueq of Residue Including          | C27 | 0.109 Check |
| PLAT340_ALERT_3_C | Low Bond Precision on C-C Bonds .....           |     | 0.0051 Ang. |
| PLAT360_ALERT_2_C | Short C(sp3)-C(sp3) Bond C28 - C29              | .   | 1.42 Ang.   |
| PLAT906_ALERT_3_C | Large K Value in the Analysis of Variance ..... |     | 3.103 Check |
| PLAT977_ALERT_2_C | Check Negative Difference Density on H27A       | .   | -0.34 eA-3  |
| PLAT977_ALERT_2_C | Check Negative Difference Density on H27B       | .   | -0.34 eA-3  |
| PLAT977_ALERT_2_C | Check Negative Difference Density on H28B       | .   | -0.31 eA-3  |
| PLAT977_ALERT_2_C | Check Negative Difference Density on H29A       | .   | -0.38 eA-3  |
| PLAT977_ALERT_2_C | Check Negative Difference Density on H30A       | .   | -0.36 eA-3  |
| PLAT977_ALERT_2_C | Check Negative Difference Density on H30B       | .   | -0.36 eA-3  |

---

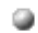

### Alert level G

|                   |                                                  |                |             |
|-------------------|--------------------------------------------------|----------------|-------------|
| PLAT066_ALERT_1_G | Predicted and Reported Tmin&Tmax Range Identical |                | ? Check     |
| PLAT072_ALERT_2_G | SHELXL First Parameter in WGHT Unusually Large   |                | 0.10 Report |
| PLAT083_ALERT_2_G | SHELXL Second Parameter in WGHT Unusually Large  |                | 11.70 Why ? |
| PLAT300_ALERT_4_G | Atom Site Occupancy of H27A                      | Constrained at | 0.5 Check   |
| PLAT300_ALERT_4_G | Atom Site Occupancy of H27B                      | Constrained at | 0.5 Check   |
| PLAT300_ALERT_4_G | Atom Site Occupancy of H30A                      | Constrained at | 0.5 Check   |
| PLAT300_ALERT_4_G | Atom Site Occupancy of H30B                      | Constrained at | 0.5 Check   |
| PLAT380_ALERT_4_G | Incorrectly? Oriented X(sp2)-Methyl Moiety ..... |                | C10 Check   |
| PLAT410_ALERT_2_G | Short Intra H...H Contact H27A ..H28B            | .              | 2.07 Ang.   |
|                   |                                                  | x,y,z =        | 1_555 Check |
| PLAT410_ALERT_2_G | Short Intra H...H Contact H27A ..H28A            | .              | 2.05 Ang.   |
|                   |                                                  | 3/2-x,y,1-z =  | 2_656 Check |
| PLAT410_ALERT_2_G | Short Intra H...H Contact H27B ..H28A            | .              | 2.06 Ang.   |
|                   |                                                  | x,y,z =        | 1_555 Check |
| PLAT410_ALERT_2_G | Short Intra H...H Contact H27B ..H28B            | .              | 2.07 Ang.   |
|                   |                                                  | 3/2-x,y,1-z =  | 2_656 Check |
| PLAT410_ALERT_2_G | Short Intra H...H Contact H29A ..H30B            | .              | 2.08 Ang.   |
|                   |                                                  | x,y,z =        | 1_555 Check |
| PLAT410_ALERT_2_G | Short Intra H...H Contact H29A ..H30B            | .              | 2.08 Ang.   |
|                   |                                                  | x,y,z =        | 1_555 Check |
| PLAT410_ALERT_2_G | Short Intra H...H Contact H29B ..H30A            | .              | 2.08 Ang.   |
|                   |                                                  | x,y,z =        | 1_555 Check |
| PLAT410_ALERT_2_G | Short Intra H...H Contact H29B ..H30A            | .              | 2.08 Ang.   |
|                   |                                                  | x,y,z =        | 1_555 Check |
| PLAT411_ALERT_2_G | Short Inter H...H Contact H15 ..H27B             | .              | 2.12 Ang.   |
|                   |                                                  | x,y,z =        | 1_555 Check |
| PLAT411_ALERT_2_G | Short Inter H...H Contact H15 ..H27B             | .              | 2.12 Ang.   |
|                   |                                                  | x,y,z =        | 1_555 Check |
| PLAT883_ALERT_1_G | No Info/Value for _atom_sites_solution_primary   |                | Please Do ! |
| PLAT912_ALERT_4_G | Missing # of FCF Reflections Above STh/L= 0.600  |                | 88 Note     |
| PLAT941_ALERT_3_G | Average HKL Measurement Multiplicity .....       |                | 3.8 Low     |
| PLAT955_ALERT_1_G | Reported (CIF) and Actual (FCF) Lmax Differ by   |                | 1 Units     |
| PLAT978_ALERT_2_G | Number C-C Bonds with Positive Residual Density. |                | 5 Info      |

---

0 **ALERT level A** = Most likely a serious problem - resolve or explain

0 **ALERT level B** = A potentially serious problem, consider carefully  
11 **ALERT level C** = Check. Ensure it is not caused by an omission or oversight  
23 **ALERT level G** = General information/check it is not something unexpected

3 ALERT type 1 CIF construction/syntax error, inconsistent or missing data  
21 ALERT type 2 Indicator that the structure model may be wrong or deficient  
3 ALERT type 3 Indicator that the structure quality may be low  
7 ALERT type 4 Improvement, methodology, query or suggestion  
0 ALERT type 5 Informative message, check

---

It is advisable to attempt to resolve as many as possible of the alerts in all categories. Often the minor alerts point to easily fixed oversights, errors and omissions in your CIF or refinement strategy, so attention to these fine details can be worthwhile. In order to resolve some of the more serious problems it may be necessary to carry out additional measurements or structure refinements. However, the purpose of your study may justify the reported deviations and the more serious of these should normally be commented upon in the discussion or experimental section of a paper or in the "special\_details" fields of the CIF. checkCIF was carefully designed to identify outliers and unusual parameters, but every test has its limitations and alerts that are not important in a particular case may appear. Conversely, the absence of alerts does not guarantee there are no aspects of the results needing attention. It is up to the individual to critically assess their own results and, if necessary, seek expert advice.

### **Publication of your CIF in IUCr journals**

A basic structural check has been run on your CIF. These basic checks will be run on all CIFs submitted for publication in IUCr journals (*Acta Crystallographica*, *Journal of Applied Crystallography*, *Journal of Synchrotron Radiation*); however, if you intend to submit to *Acta Crystallographica Section C* or *E* or *IUCrData*, you should make sure that full publication checks are run on the final version of your CIF prior to submission.

### **Publication of your CIF in other journals**

Please refer to the *Notes for Authors* of the relevant journal for any special instructions relating to CIF submission.

---

**PLATON version of 20/01/2022; check.def file version of 19/01/2022**

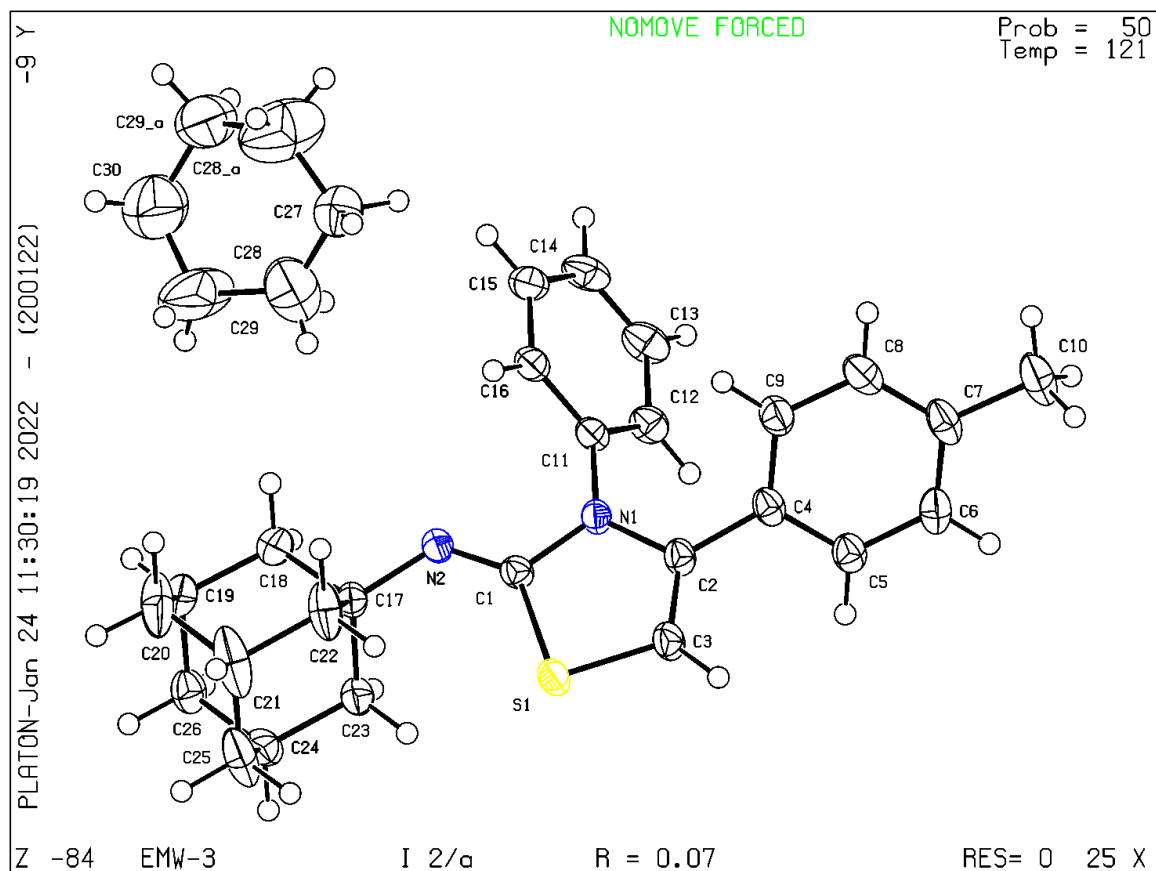

## checkCIF/PLATON report

Structure factors have been supplied for datablock(s) EMW-4

THIS REPORT IS FOR GUIDANCE ONLY. IF USED AS PART OF A REVIEW PROCEDURE FOR PUBLICATION, IT SHOULD NOT REPLACE THE EXPERTISE OF AN EXPERIENCED CRYSTALLOGRAPHIC REFEREE.

No syntax errors found.      CIF dictionary      Interpreting this report

### Datablock: EMW-4

---

Bond precision:      C-C = 0.0046 Å      Wavelength=1.54184

Cell:                      a=7.1421(5)                      b=11.6290(8)                      c=15.1229(12)  
                              alpha=107.993(7)                      beta=99.633(6)                      gamma=95.238(6)  
Temperature:              329 K

|                        | Calculated   | Reported     |
|------------------------|--------------|--------------|
| Volume                 | 1164.00(16)  | 1163.99(16)  |
| Space group            | P -1         | P -1         |
| Hall group             | -P 1         | -P 1         |
| Moiety formula         | C29 H28 N2 S | C29 H28 N2 S |
| Sum formula            | C29 H28 N2 S | C29 H28 N2 S |
| Mr                     | 436.59       | 436.59       |
| Dx, g cm <sup>-3</sup> | 1.246        | 1.246        |
| Z                      | 2            | 2            |
| Mu (mm <sup>-1</sup> ) | 1.365        | 1.365        |
| F000                   | 464.0        | 464.0        |
| F000'                  | 465.77       |              |
| h, k, lmax             | 8, 14, 18    | 8, 14, 18    |
| Nref                   | 4776         | 4776         |
| Tmin, Tmax             | 0.906, 0.960 | 0.906, 0.960 |
| Tmin'                  | 0.664        |              |

Correction method= # Reported T Limits: Tmin=0.906 Tmax=0.960  
AbsCorr = MULTI-SCAN

Data completeness= 1.000      Theta(max)= 74.859

|                               |                   |
|-------------------------------|-------------------|
| R(reflections)= 0.0542( 2873) | wR2(reflections)= |
| S = 1.013                     | 0.1481( 4698)     |
| Npar= 289                     |                   |

---

The following ALERTS were generated. Each ALERT has the format

**test-name\_ALERT\_alert-type\_alert-level.**

Click on the hyperlinks for more details of the test.

---



#### **Alert level C**

|                   |       |                                           |         |       |
|-------------------|-------|-------------------------------------------|---------|-------|
| PLAT242_ALERT_2_C | Low   | 'MainMol' Ueq as Compared to Neighbors of | C20     | Check |
| PLAT340_ALERT_3_C | Low   | Bond Precision on C-C Bonds .....         | 0.00465 | Ang.  |
| PLAT906_ALERT_3_C | Large | K Value in the Analysis of Variance ..... | 4.315   | Check |

---

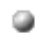

#### **Alert level G**

|                   |                                                  |        |       |
|-------------------|--------------------------------------------------|--------|-------|
| PLAT066_ALERT_1_G | Predicted and Reported Tmin&Tmax Range Identical | ?      | Check |
| PLAT883_ALERT_1_G | No Info/Value for _atom_sites_solution_primary . | Please | Do !  |
| PLAT912_ALERT_4_G | Missing # of FCF Reflections Above STh/L= 0.600  | 78     | Note  |
| PLAT941_ALERT_3_G | Average HKL Measurement Multiplicity .....       | 3.8    | Low   |
| PLAT978_ALERT_2_G | Number C-C Bonds with Positive Residual Density. | 1      | Info  |

---

- 0 **ALERT level A** = Most likely a serious problem - resolve or explain  
0 **ALERT level B** = A potentially serious problem, consider carefully  
3 **ALERT level C** = Check. Ensure it is not caused by an omission or oversight  
5 **ALERT level G** = General information/check it is not something unexpected
- 2 ALERT type 1 CIF construction/syntax error, inconsistent or missing data  
2 ALERT type 2 Indicator that the structure model may be wrong or deficient  
3 ALERT type 3 Indicator that the structure quality may be low  
1 ALERT type 4 Improvement, methodology, query or suggestion  
0 ALERT type 5 Informative message, check
- 
-

It is advisable to attempt to resolve as many as possible of the alerts in all categories. Often the minor alerts point to easily fixed oversights, errors and omissions in your CIF or refinement strategy, so attention to these fine details can be worthwhile. In order to resolve some of the more serious problems it may be necessary to carry out additional measurements or structure refinements. However, the purpose of your study may justify the reported deviations and the more serious of these should normally be commented upon in the discussion or experimental section of a paper or in the "special\_details" fields of the CIF. checkCIF was carefully designed to identify outliers and unusual parameters, but every test has its limitations and alerts that are not important in a particular case may appear. Conversely, the absence of alerts does not guarantee there are no aspects of the results needing attention. It is up to the individual to critically assess their own results and, if necessary, seek expert advice.

### **Publication of your CIF in IUCr journals**

A basic structural check has been run on your CIF. These basic checks will be run on all CIFs submitted for publication in IUCr journals (*Acta Crystallographica*, *Journal of Applied Crystallography*, *Journal of Synchrotron Radiation*); however, if you intend to submit to *Acta Crystallographica Section C* or *E* or *IUCrData*, you should make sure that **full publication checks** are run on the final version of your CIF prior to submission.

### **Publication of your CIF in other journals**

Please refer to the *Notes for Authors* of the relevant journal for any special instructions relating to CIF submission.

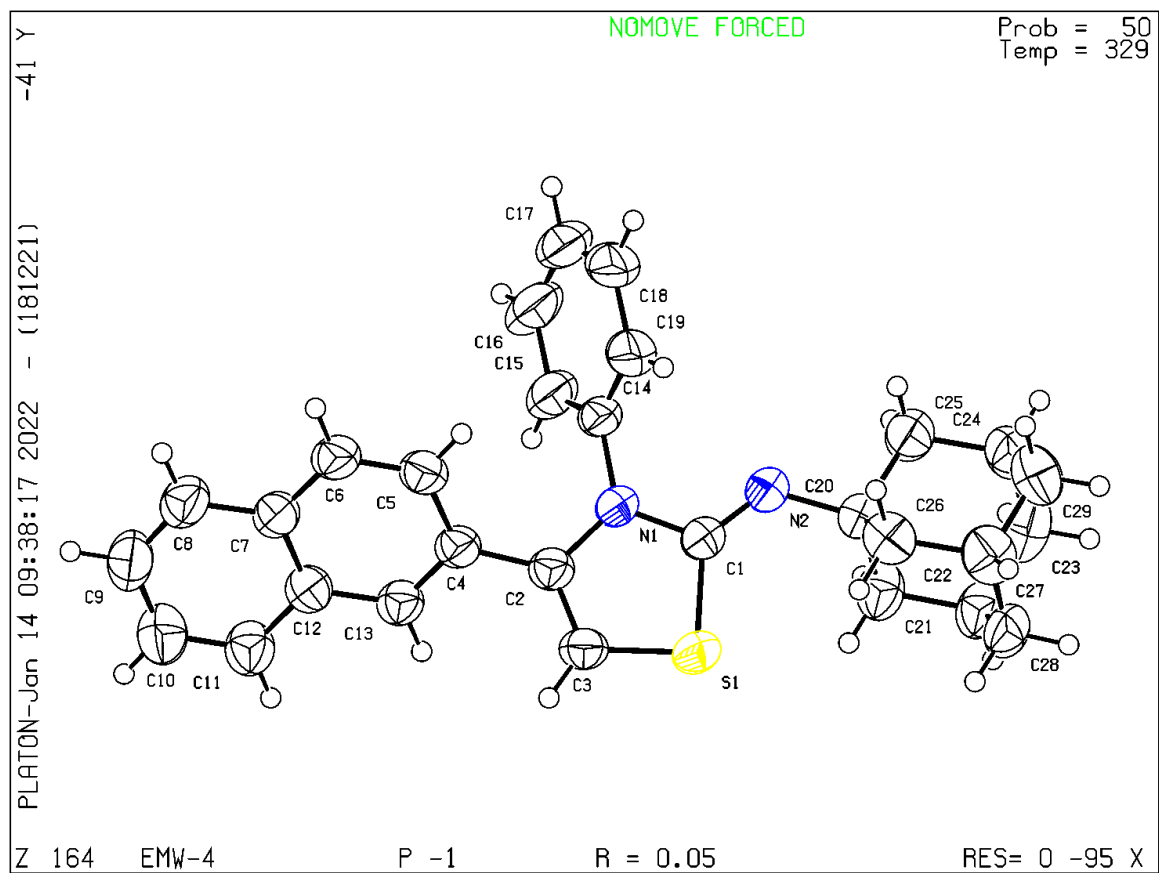

Supplement: MOESM1 [file 41598_2022_25390_MOESM1_ESM.pdf]
